# Supplementary material for: Diverse Thermophilic Anaerobes from Indian Hot Springs Exhibit High Potential for Bioenergy Production from Lignocellulosic Biomass
Source: Research Square preprint supplement (doi:10.21203/rs.3.rs-8018409/v1), 2025-11-17

**Supplementary data**

**Diverse Thermophilic Anaerobes from Indian Hot Springs Exhibit High Potential for Bioenergy Production from Lignocellulosic Biomass**

Sai Suresh Hivarkar1,2, Prashant K. Dhakephalkar1,2 and Sumit Singh Dagar1,2*

1Bioenergy Group, Agharkar Research Institute, Pune, India

2Savitribai Phule Pune University, Ganeshkhind, Pune, India

*Corresponding author:

Mailing address: Bioenergy Group, Agharkar Research Institute, Gopal Ganesh Agarkar Road, Pune – 411004, India.

E-mail: [ssdagar@aripune.org](mailto:ssdagar@aripune.org), [dagarsumit@gmail.com](mailto:dagarsumit@gmail.com)

**Supplementary tables**

**Table S1.** Summary of the reaction conditions used to estimate enzyme activities.

| **Enzyme activity** | **Buffer**  (100 mM; pH 7.0±0.1) | **Substrate** | **Reaction mixture** | | **Culture supernatant**  (ml) | **Incubation time**  (min) |
| --- | --- | --- | --- | --- | --- | --- |
| **Buffer**  (ml) | **Substrate**  (mg) |
| CMCase | Sodium phosphate | CMC | 0.15 | 1.5 | 0.05 | 30 |
| Avicelase | Sodium phosphate | Avicel | 0.10 | 1 | 0.10 | 60 |
| Xylanase | Sodium phosphate | Xylan | 0.15 | 1.5 | 0.05 | 30 |
| β-glucosidase | Sodium phosphate | ρ-Nitrophenyl  β-D-glucopyranoside | 0.15 | 0.45 | 0.05 | 10 |
| Acetyl esterase | Sodium phosphate | ρ-Nitrophenyl acetate | 1.9 | 0.36 | 0.10 | 10 |
| ρ-coumaroyl esterase | 3-Morpholinopropanesulfonic acid | De-starched wheat bran | 0.5 | 50 | 0.50 | 30 |
| Feruloyl esterase | 3-Morpholinopropanesulfonic acid | De-starched wheat bran | 0.5 | 50 | 0.50 | 30 |

**Table S2.** Summary of the geographical location and physicochemical characteristics of different hot springs.

| **Name of hot spring** | **State** | **Co-ordinates** | | **pH**  **(±0.2)** | **Temperature**  **(±2°C)** | **Conductivity**  **(±10 µS)** | **Anions**  **(mg/Kg)** |
| --- | --- | --- | --- | --- | --- | --- | --- |
| **Latitude** | **Longitude** |
| Aravali | Maharashtra | 17°18'58.6"N | 73°31'19.8"E | 9.1 | 42 | 2131 | 188 (c), 62 (s) |
| Chopada | Maharashtra | 21°15'57.6"N | 75°25'53.7"E | 8.8 | 41 | 421 | 496 (c) |
| Chumathang | Ladakh | 33°21'37.1"N | 78°19'23.7"E | 8.3 | 85 | 1601 | 95 (c), 137 (s) |
| Jakrem | Meghalaya | 25°24'26.0"N | 91°32'27.5"E | 8.9 | 45 | 1230 | 15 (c), 18 (s) |
| Puga | Ladakh | 33°13'21.6"N | 78°19'06.0"E | 8.8 | 82 | 2765 | 108 (c), 138 (s) |
| Rajwadi | Maharashtra | 17°14'12.4"N | 73°33'50.0"E | 8.0 | 51 | 1614 | 78 (c), 11 (s) |
| Shahada | Maharashtra | 21°43'45.0"N | 74°26'36.9"E | 8.2 | 25 | 384 | 67 (c), 138 (n) |
| Tural | Maharashtra | 17°14'57.6"N | 73°33'15.4"E | 7.9 | 61 | 1674 | 89 (c) |
| Unhavare | Maharashtra | 17°36'11.2"N | 73°19'10.7"E | 7.8 | 78 | 3999 | 294 (c), 18 (s) |
| Unkeshwar | Maharashtra | 19°51'21.7"N | 78°15'01.6"E | 7.7 | 30 | 1254 | 45 (p) |

Legends: nd, not determined; c, chloride; n, nitrate; p, phosphate; s, sulphate

Permissible limit by World Health Organization (2017): Chloride, 250 mg/Kg; Nitrate, 50 mg/Kg; Sulphate, 250 mg/Kg

**Table S3.** Summary of positive enrichments (based on turbidity and ≥10% hydrogen) obtained from different hot springs grown under varying culture conditions.

| **Substrate** | **Incubation temperature (℃)** | **Name of the hot spring** | | | | | | | | | |
| --- | --- | --- | --- | --- | --- | --- | --- | --- | --- | --- | --- |
| **Aravali** | **Chopada** | **Chumathang** | **Jakrem** | **Puga** | **Rajwadi** | **Shahada** | **Tural** | **Unhavare** | **Unkeshwar** |
| Cellulose | 40 | **–** | **–** | **–** | **–** | **–** | **–** | **–** | **–** | **–** | **–** |
| 55 | **–** | **+** | **–** | **–** | **–** | **+** | **–** | **+** | **+** | **–** |
| 70 | **–** | **–** | **–** | **–** | **–** | **–** | **–** | **+** | **+** | **–** |
| 85 | **–** | **+** | **–** | **–** | **+** | **–** | **–** | **–** | **+** | **–** |
| Xylan | 40 | **+** | **–** | **–** | **–** | **–** | **–** | **–** | **–** | **–** | **–** |
| 55 | **–** | **+** | **+** | **–** | **+** | **+** | **–** | **+** | **+** | **–** |
| 70 | **–** | **+** | **+** | **–** | **–** | **–** | **–** | **+** | **+** | **–** |
| 85 | **–** | **+** | **+** | **–** | **–** | **–** | **–** | **–** | **+** | **–** |
| NDF | 40 | **–** | **–** | **–** | **–** | **–** | **–** | **–** | **–** | **–** | **–** |
| 55 | **–** | **+** | **–** | **–** | **–** | **–** | **+** | **–** | **–** | **–** |
| 70 | **–** | **+** | **–** | **–** | **–** | **–** | **–** | **–** | **–** | **–** |
| 85 | **–** | **+** | **+** | **–** | **+** | **–** | **–** | **–** | **–** | **–** |
| Lignin | 40 | **–** | **–** | **–** | **–** | **–** | **–** | **–** | **–** | **–** | **–** |
| 55 | **–** | **–** | **–** | **–** | **–** | **–** | **–** | **–** | **–** | **–** |
| 70 | **–** | **–** | **–** | **–** | **–** | **–** | **–** | **–** | **–** | **–** |
| 85 | **–** | **–** | **–** | **–** | **–** | **–** | **–** | **–** | **–** | **–** |

Legends: **+**, positive enrichment; **–**, negative enrichment

**Supplementary Figures**

**Figure S1.** Representative phase contrast images of *Sporanaerobium hydrogeniformans* XHS1971T (a), *Caloramator* *proteoclasticus* strain AMU5567-5 (b), *Caloramator* *coolhaasii* strain XMT5567-6 (c), *Thermoanaerobacter* *wiegelii* strain XMU7067-6 (d), *Bacillus* *thermozeamaize* strain XMU8567-5 (e) and *Caldicoprobacter* *guelmensis* strain CMU5567-1 (f). Gram staining images of *Caldibacillus thermoamylovorans* XLC5596-1 (g), *Thermoanaerobacterium* *aotearoense* strain AMT5567-1 (h), *Seramator thermalis* strain XHS2771 (i), *Pseudoclostridium* *thermosuccinogenes* strain CUCP55106-1 (j), *Limnochordaceae* bacterium strain XUCP55106-1 (k) and *Lacrimispora* *indolis* strain XHS1791 (l)


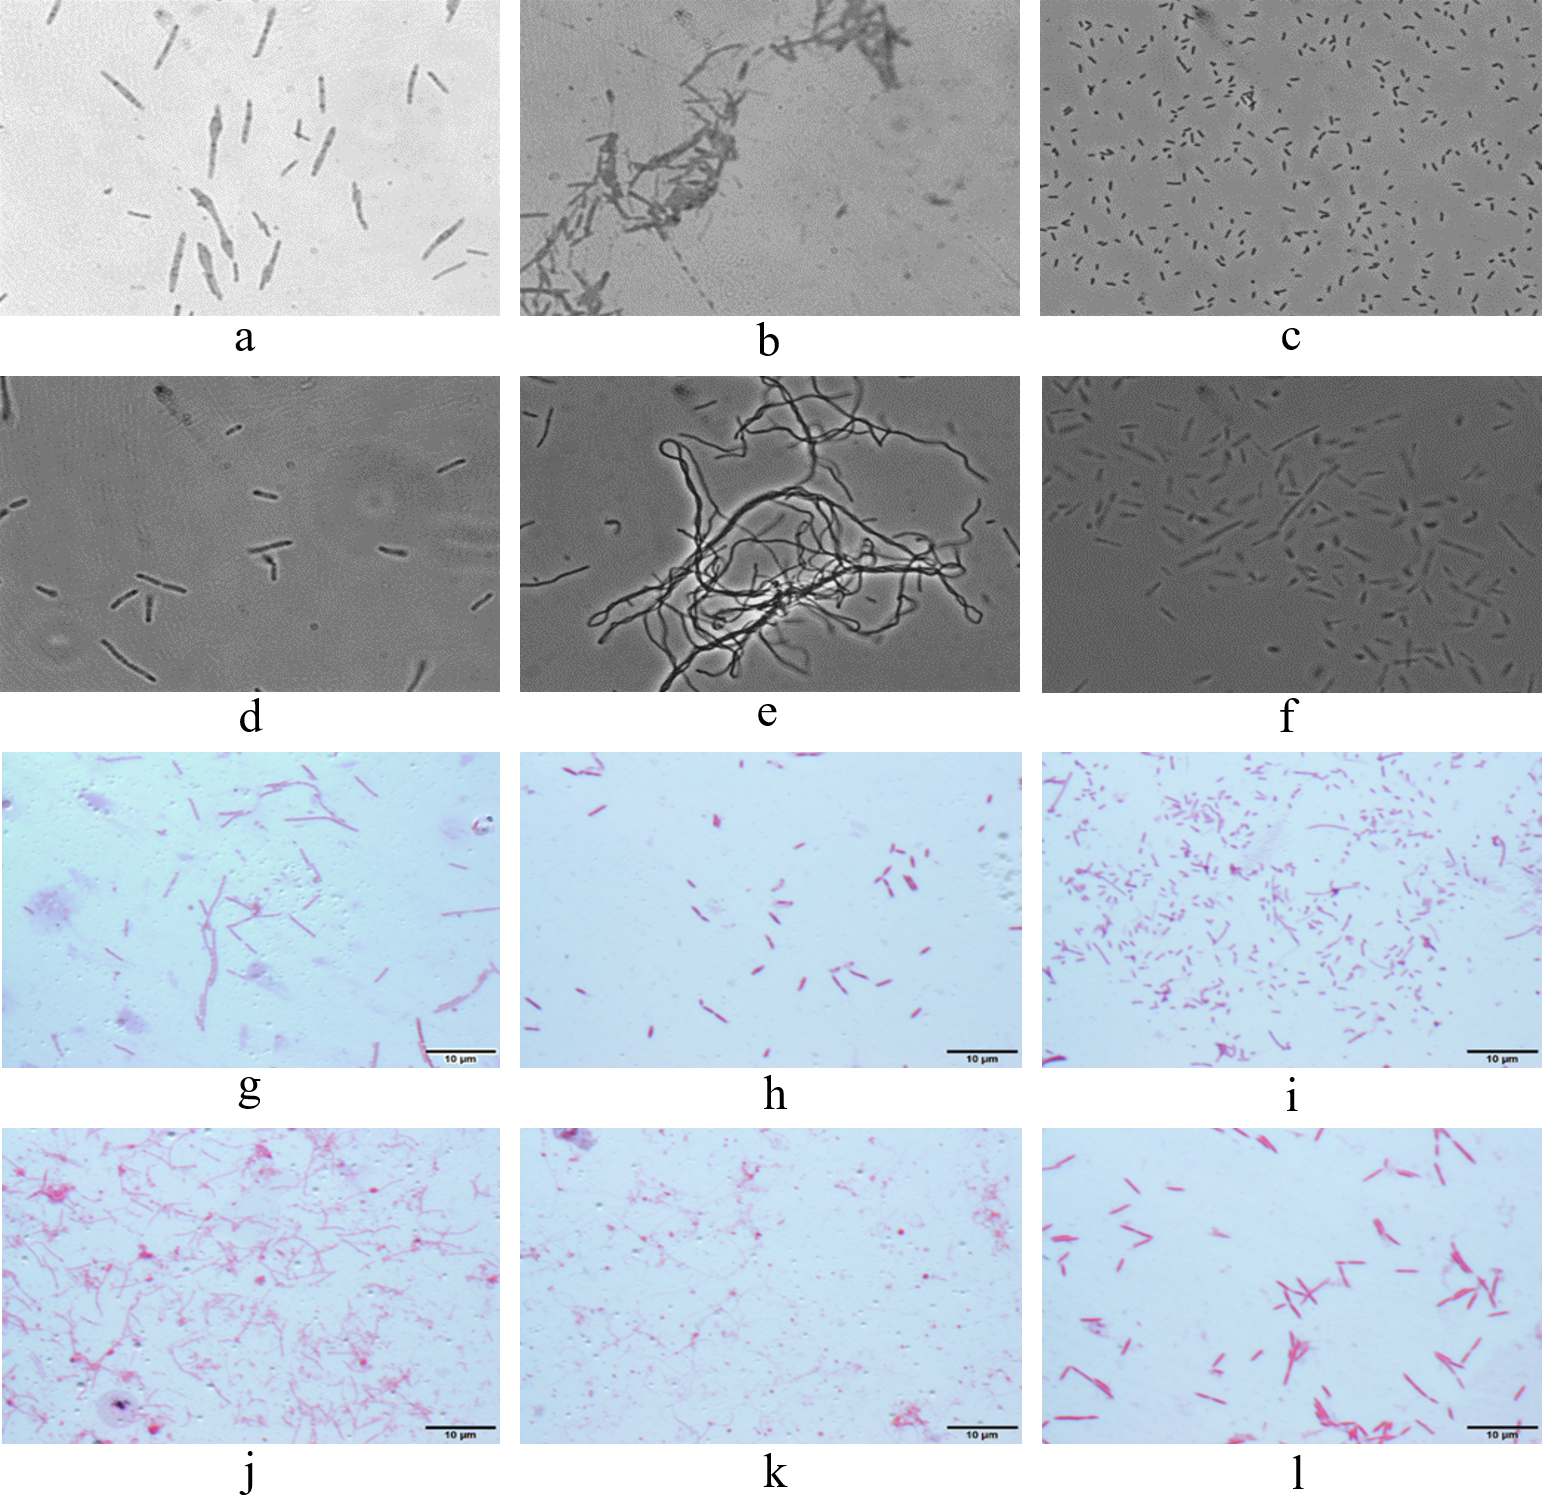


**Figure S2.** Representative RFLP gel images of cultures isolated from different hot springs. (A) Cultures isolated from cellulose-based enrichments and (B) Cultures isolated from xylan-based enrichments. The initial and last wells of each row in both pictures contain 100 bp and 50 bp ladders, respectively.


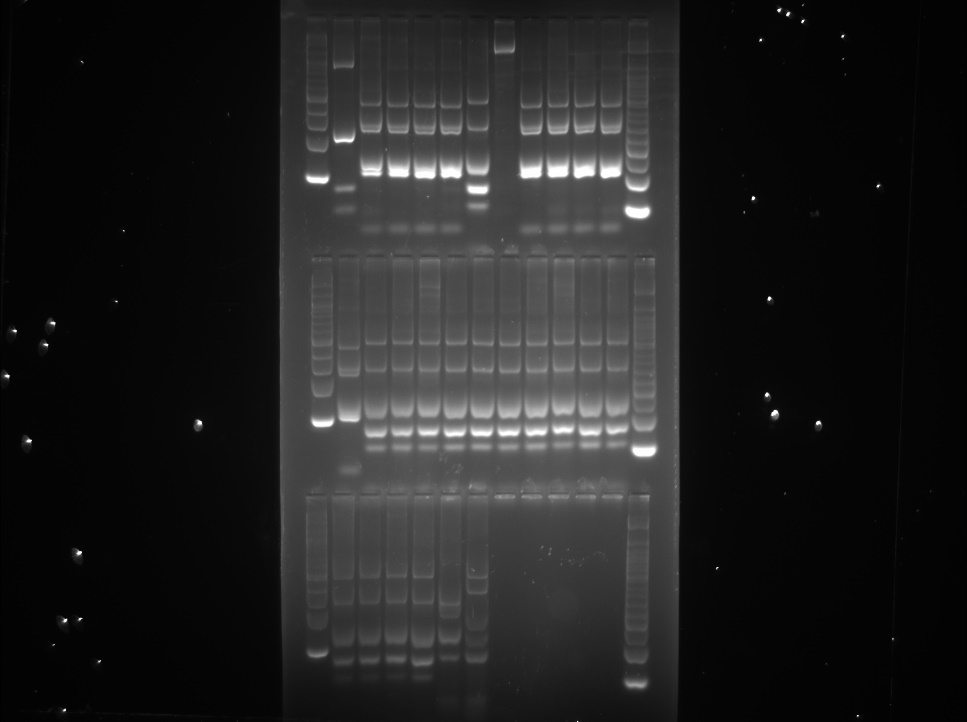

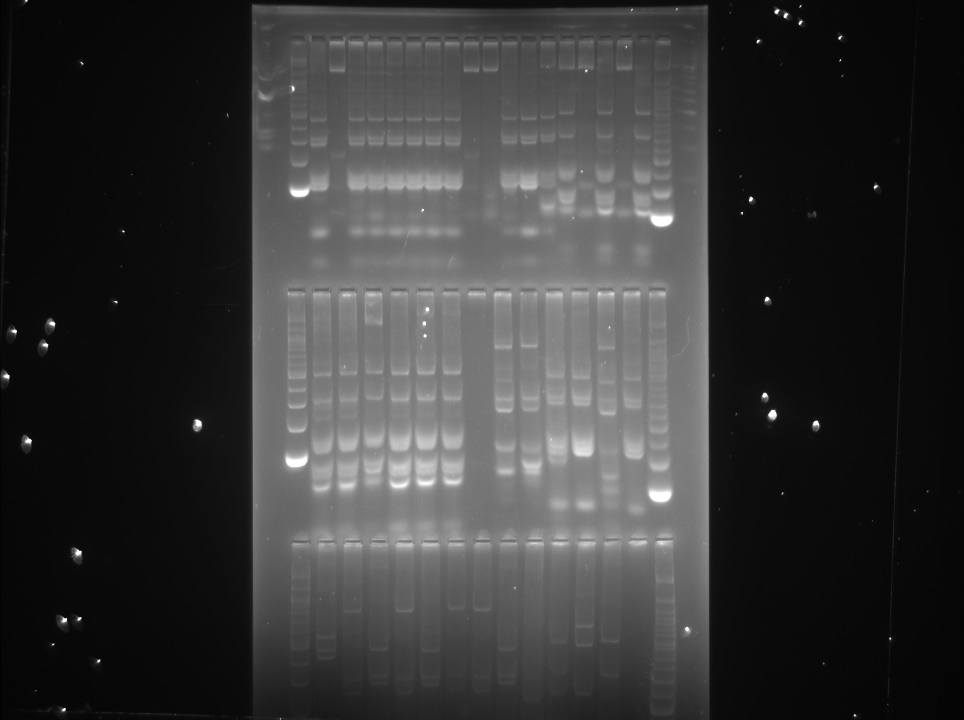


1. **(B)**

**Figure S3.** Phylogenetic tree based on 16S rRNA gene sequences showing the phylogenetic position of *Bacillus thermozeamaize* strain XMU8567-5 (in blue) among the closest type strain and non-type strain sequences. Relatedness was inferred using the maximum-likelihood method in W-IQ-TREE and rooted with *Staphylococcus aureus* ATCC 12600T. The GenBank accession number of each strain is listed in parentheses. The habitat of the sequence is written in orange. The scale bar indicates 0.02 nucleotide substitutions per site.


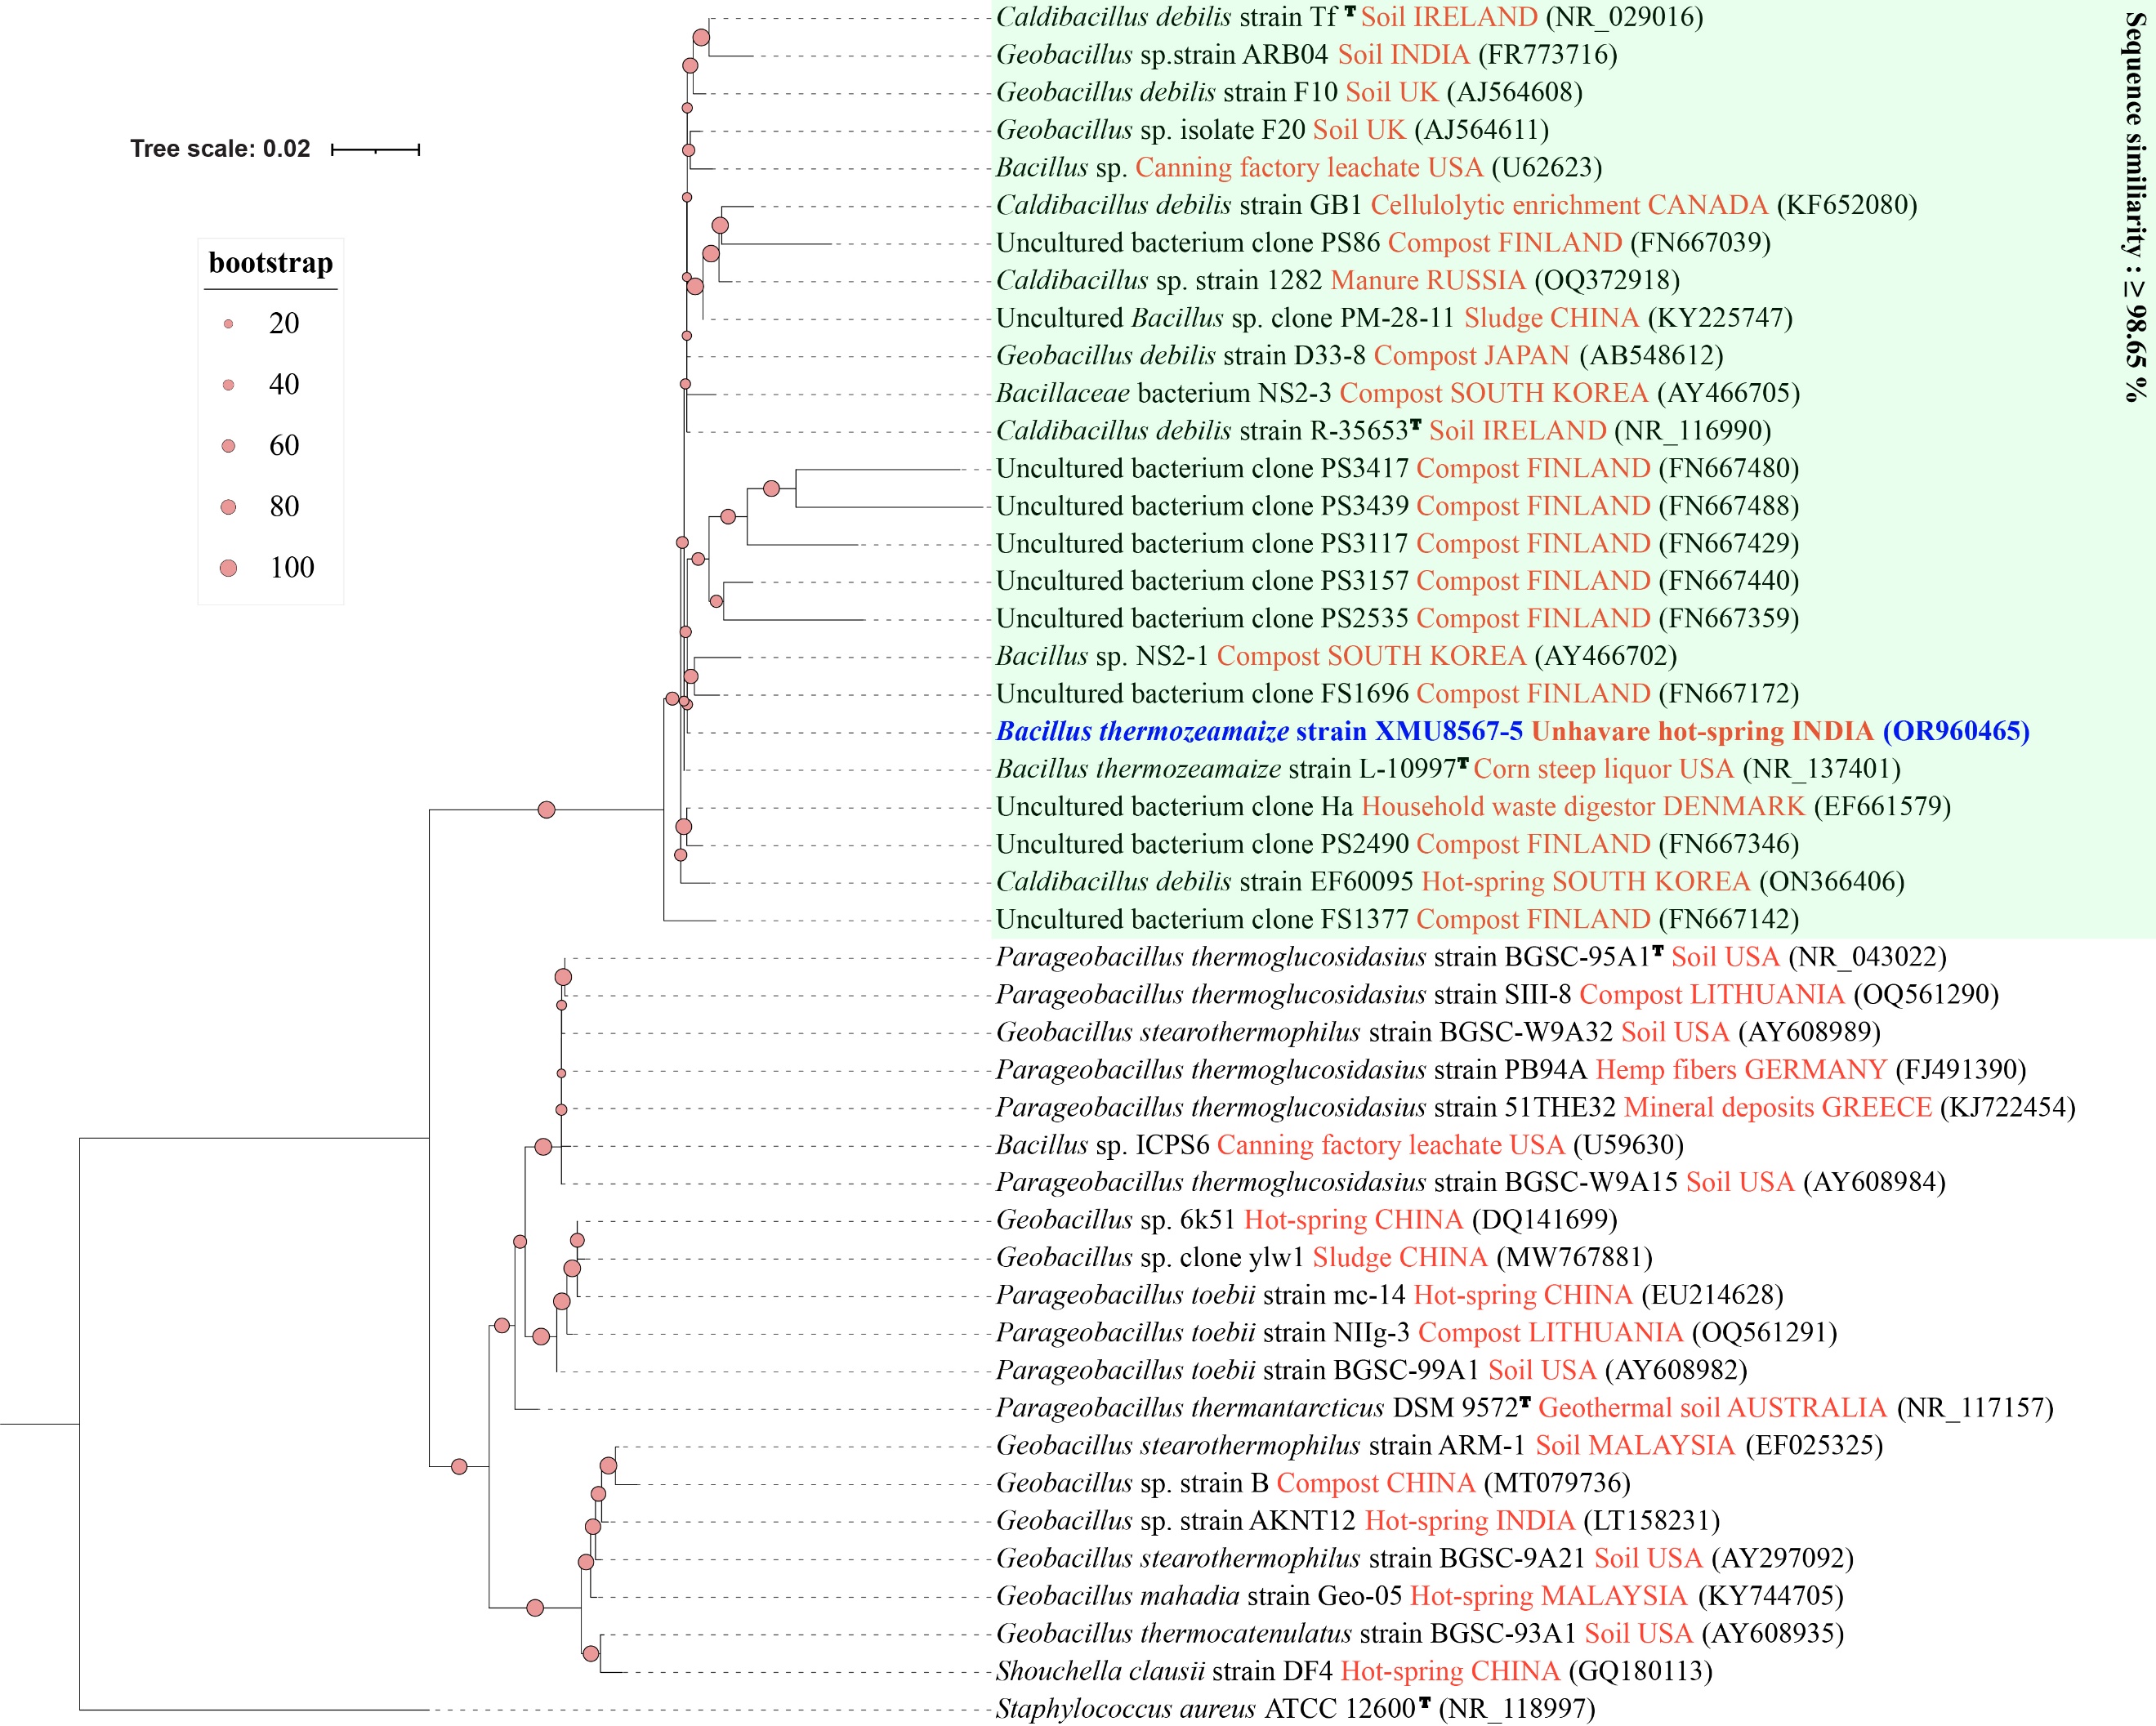


**Figure S4.** Phylogenetic tree based on 16S rRNA gene sequences showing the phylogenetic position of *Caldibacillus thermoamylovorans* strains (in blue) among the closest type strain and non-type strain sequences. Relatedness was inferred using the maximum-likelihood method in W-IQ-TREE and rooted with *Corynebacterium glutamicum* ATCC 13032T. The GenBank accession number of each strain is listed in parentheses. The habitat of the sequence is written in orange. The scale bar indicates 0.02 nucleotide substitutions per site.


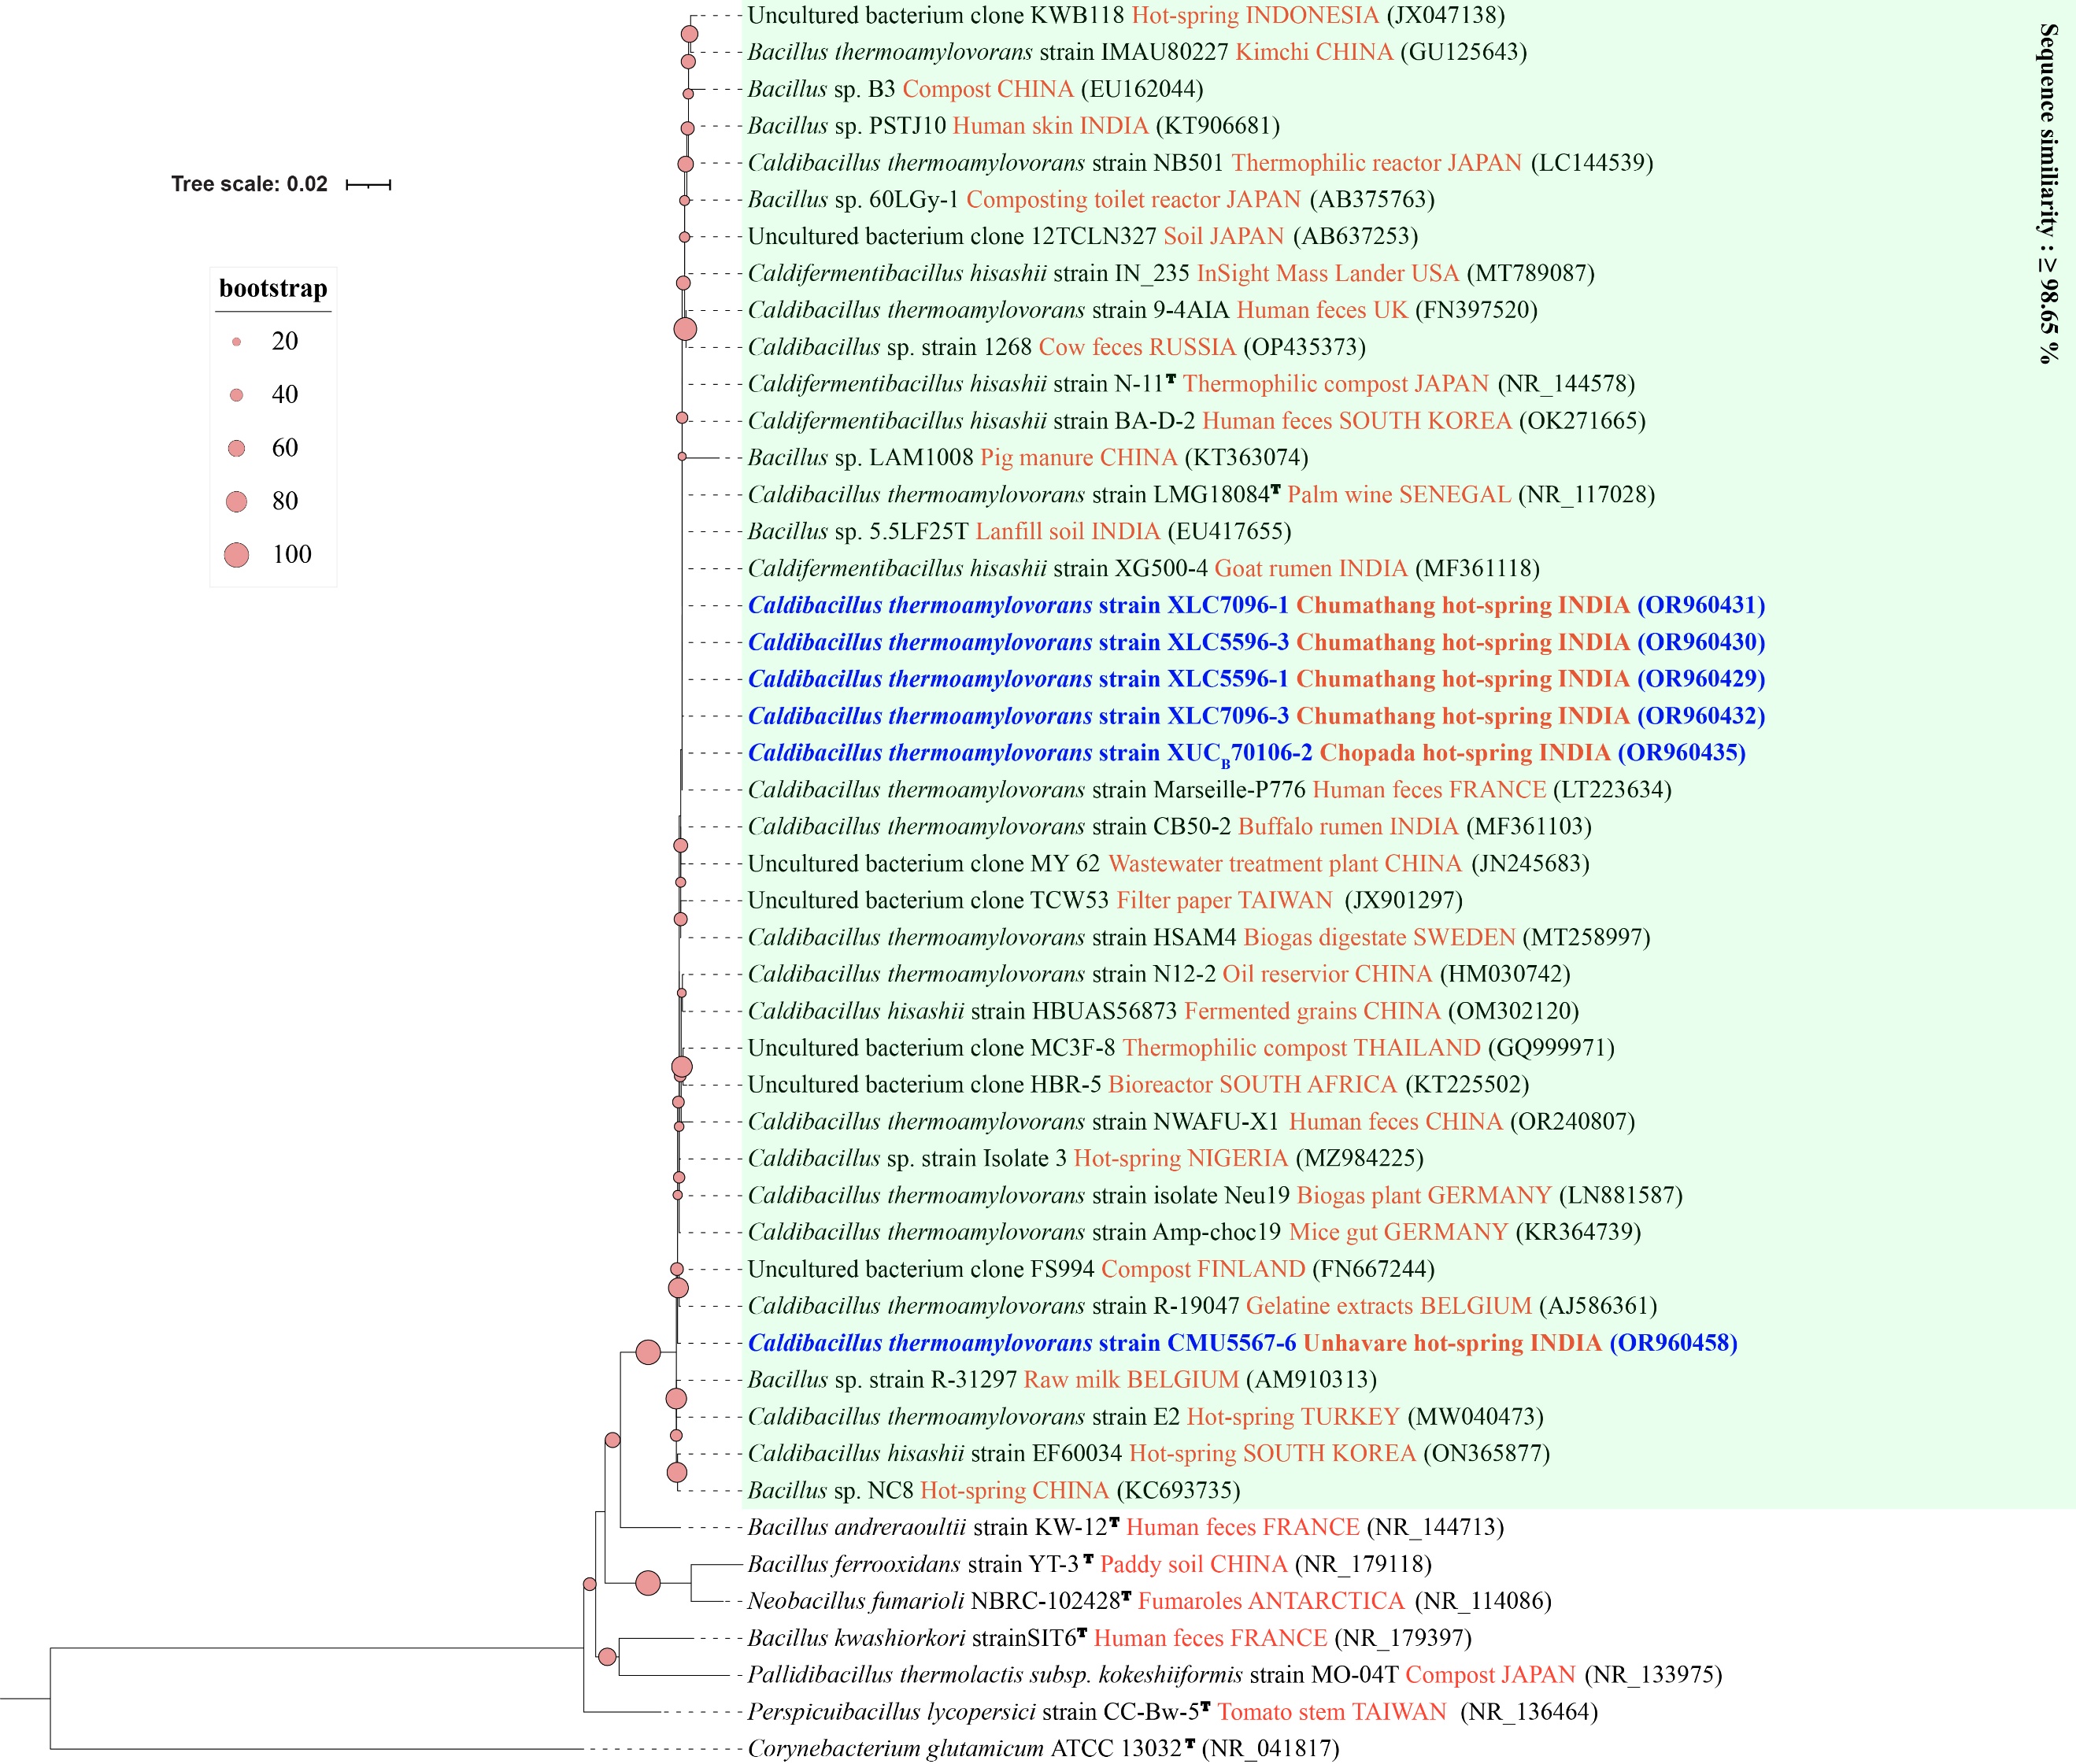


**Figure S5.** Phylogenetic tree based on 16S rRNA gene sequences showing the phylogenetic position of *Caldicoprobacteraceae* bacterium strains (in blue) among the closest type strain and non-type strain sequences. Relatedness was inferred using the maximum-likelihood method in W-IQ-TREE and rooted with *Corynebacterium glutamicum* ATCC 13032T. The GenBank accession number of each strain is listed in parentheses. The habitat of the sequence is written in orange. The scale bar indicates 0.05 nucleotide substitutions per site.


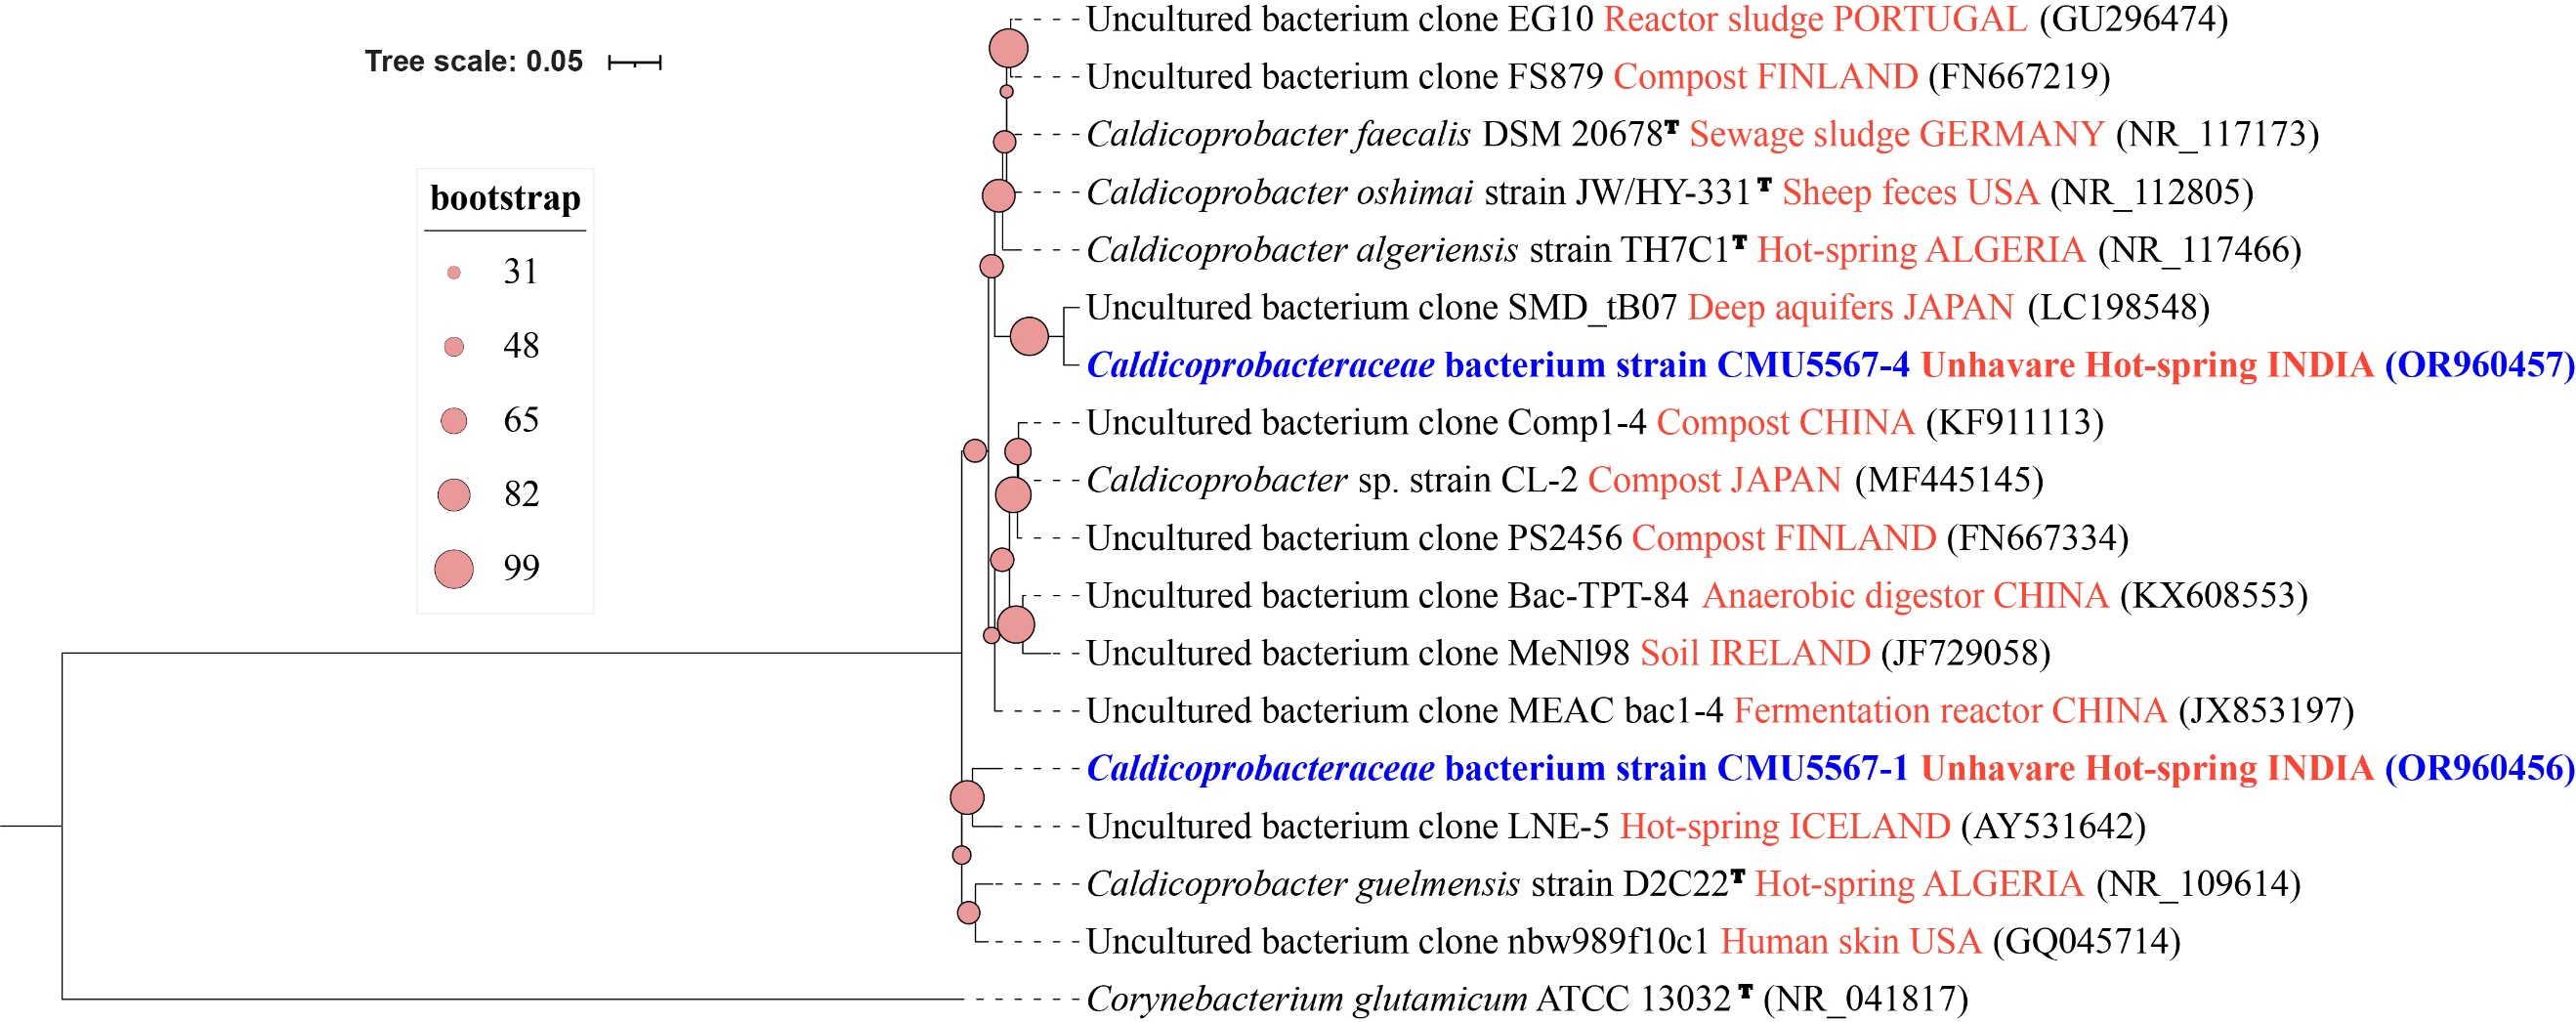


**Figure S6.** Phylogenetic tree based on 16S rRNA gene sequences showing the phylogenetic position of *Caloramator coolhaasii*, *Caloramator proteoclasticus*, and *Caloramator viterbiensis* strains (in blue) among the closest type strain and non-type strain sequences. Relatedness was inferred using the maximum-likelihood method in W-IQ-TREE and rooted with *Corynebacterium glutamicum* ATCC 13032T. The GenBank accession number of each strain is listed in parentheses. The habitat of the sequence is written in orange. The scale bar indicates 0.05 nucleotide substitutions per site.


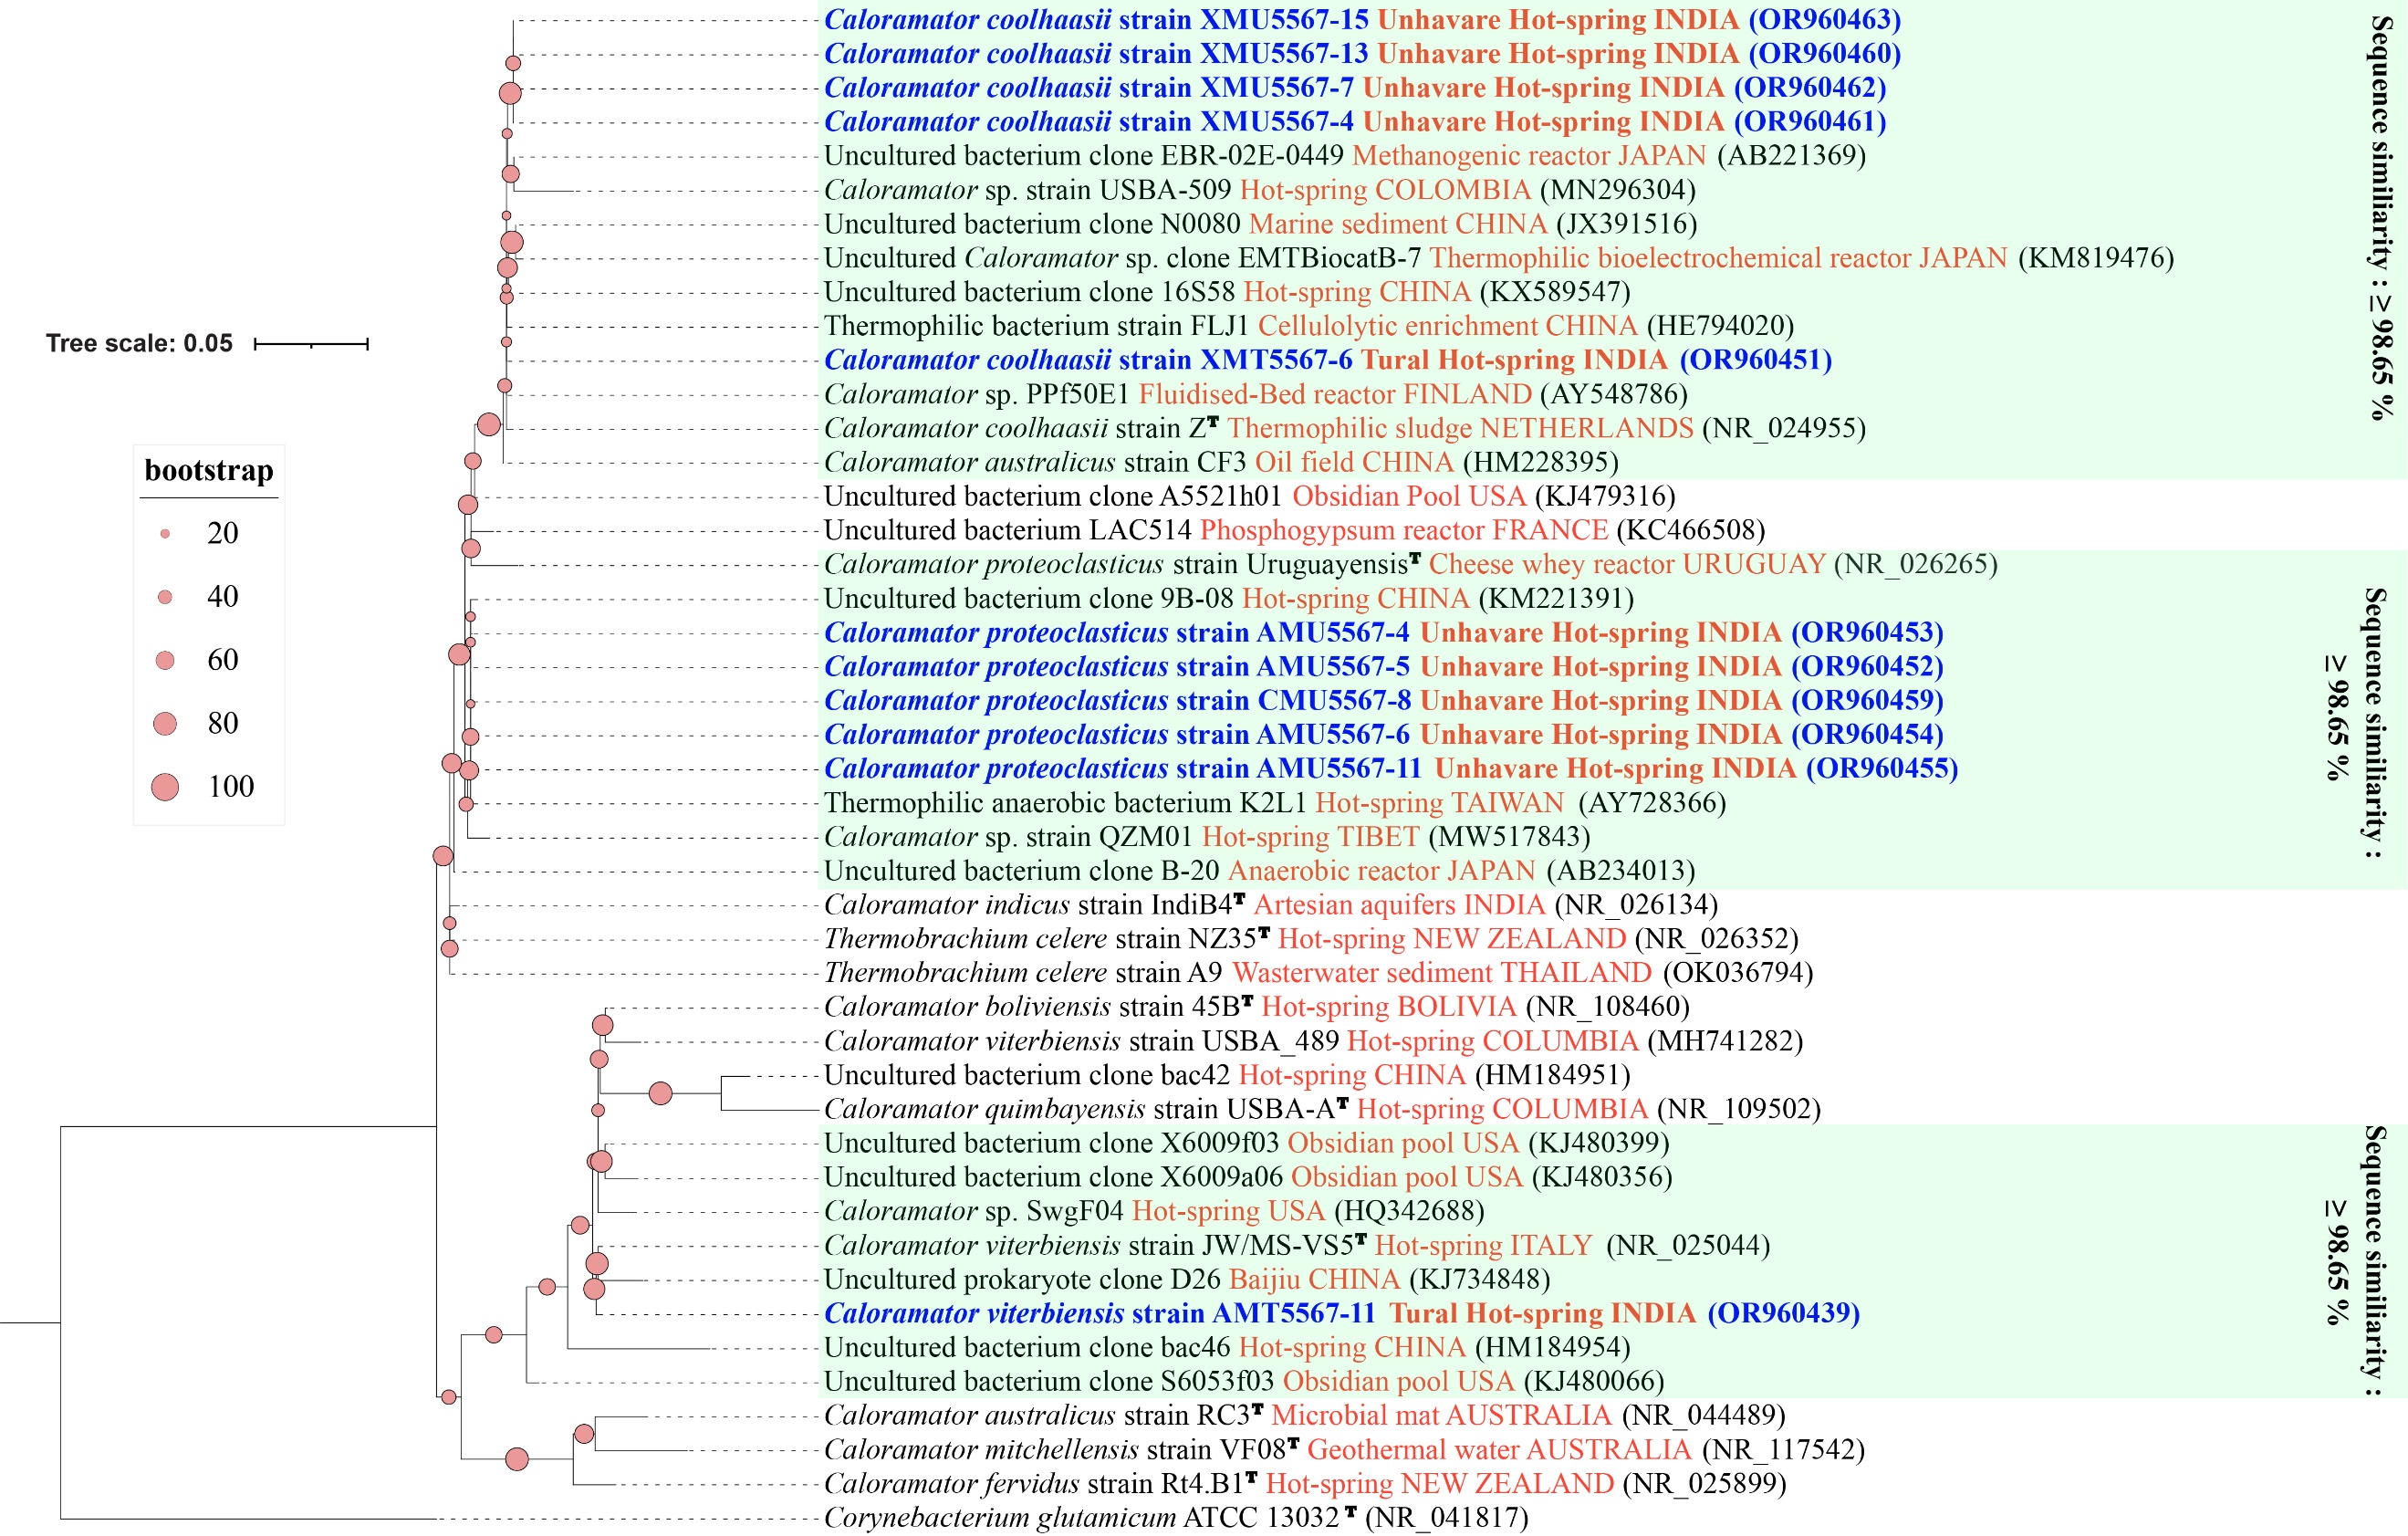


**Figure S7.** Phylogenetic tree based on 16S rRNA gene sequences showing the phylogenetic position of *Clostridium thermobutyricum* strain XMR5567-3 (in blue) among the closest type strain and non-type strain sequences. Relatedness was inferred using the maximum-likelihood method in W-IQ-TREE and rooted with *Sporohalobacter salinus* DSM 26781T. The GenBank accession number of each strain is listed in parentheses. The habitat of the sequence is written in orange. The scale bar indicates 0.05 nucleotide substitutions per site.


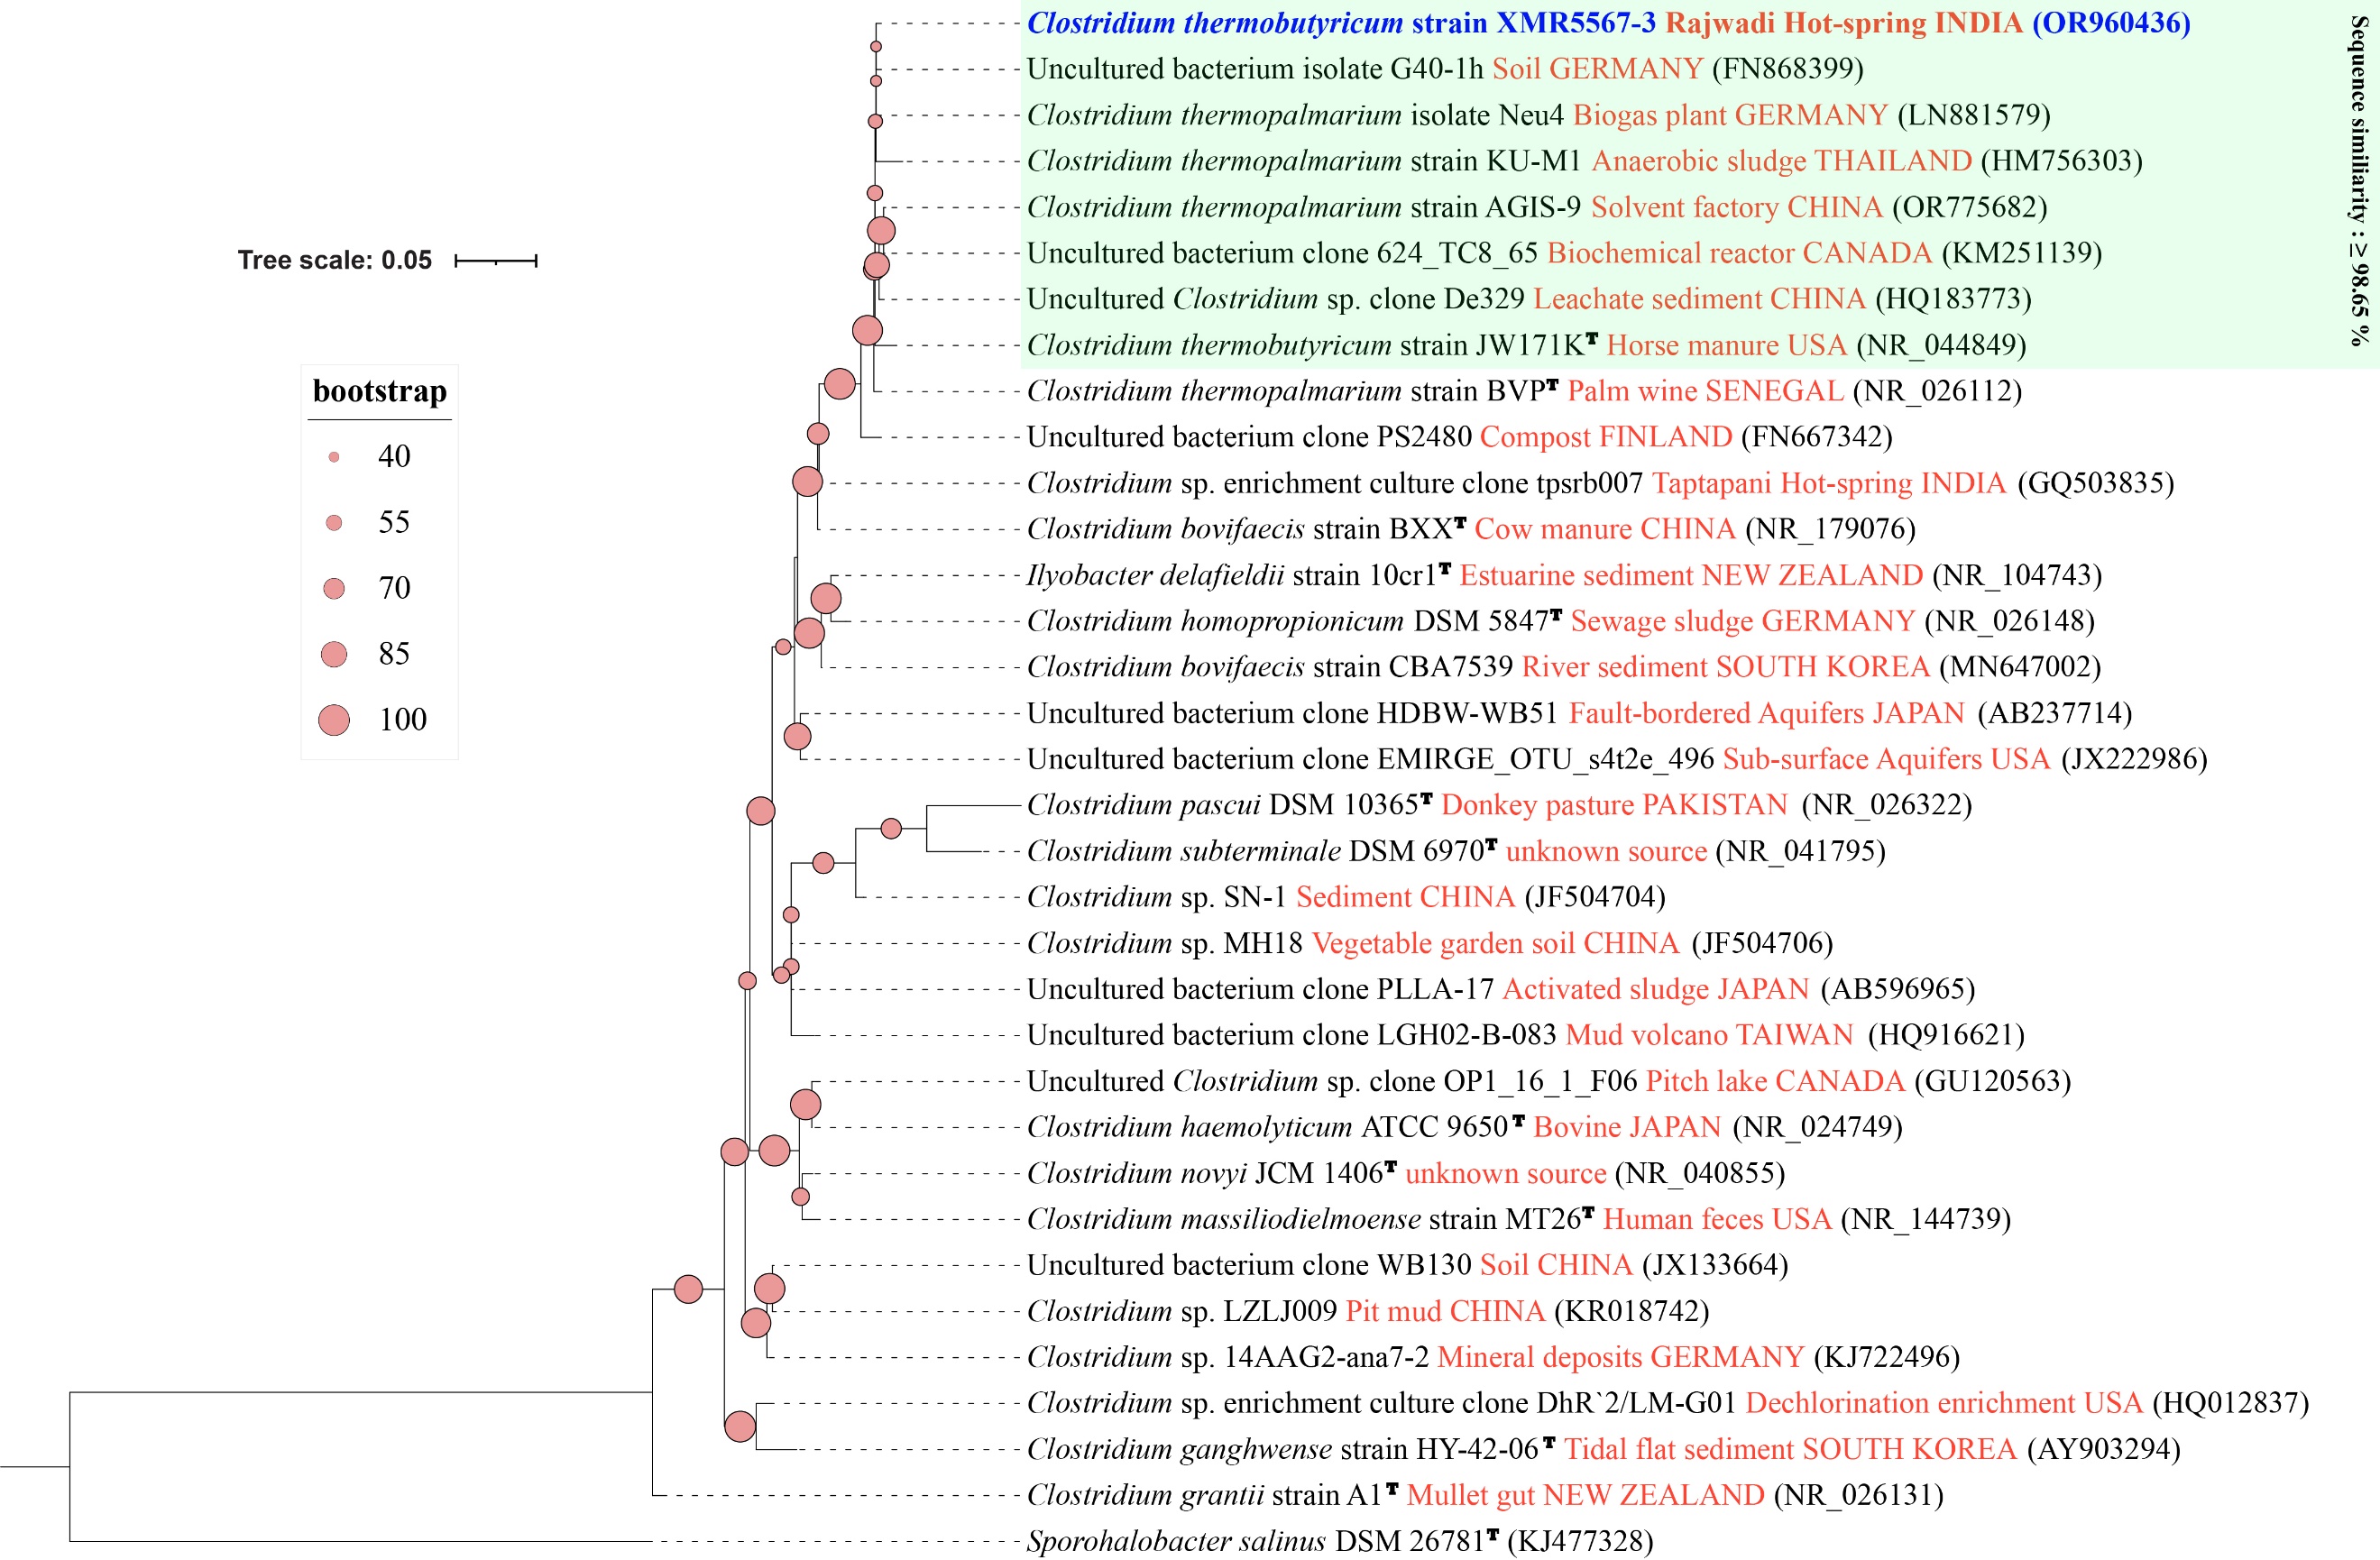


­­**Figure S8.** Phylogenetic tree based on 16S rRNA gene sequences showing the phylogenetic position of *Lacrimispora indolis* and *Lacrimispora celerecrescens* strains (in blue) among the closest type strain and non-type strain sequences. Relatedness was inferred using the maximum-likelihood method in W-IQ-TREE and rooted with *Caldicoprobacter algeriensis* DSM 22661T. The GenBank accession number of each strain is listed in parentheses. The habitat of the sequence is written in orange. The scale bar indicates 0.05 nucleotide substitutions per site.


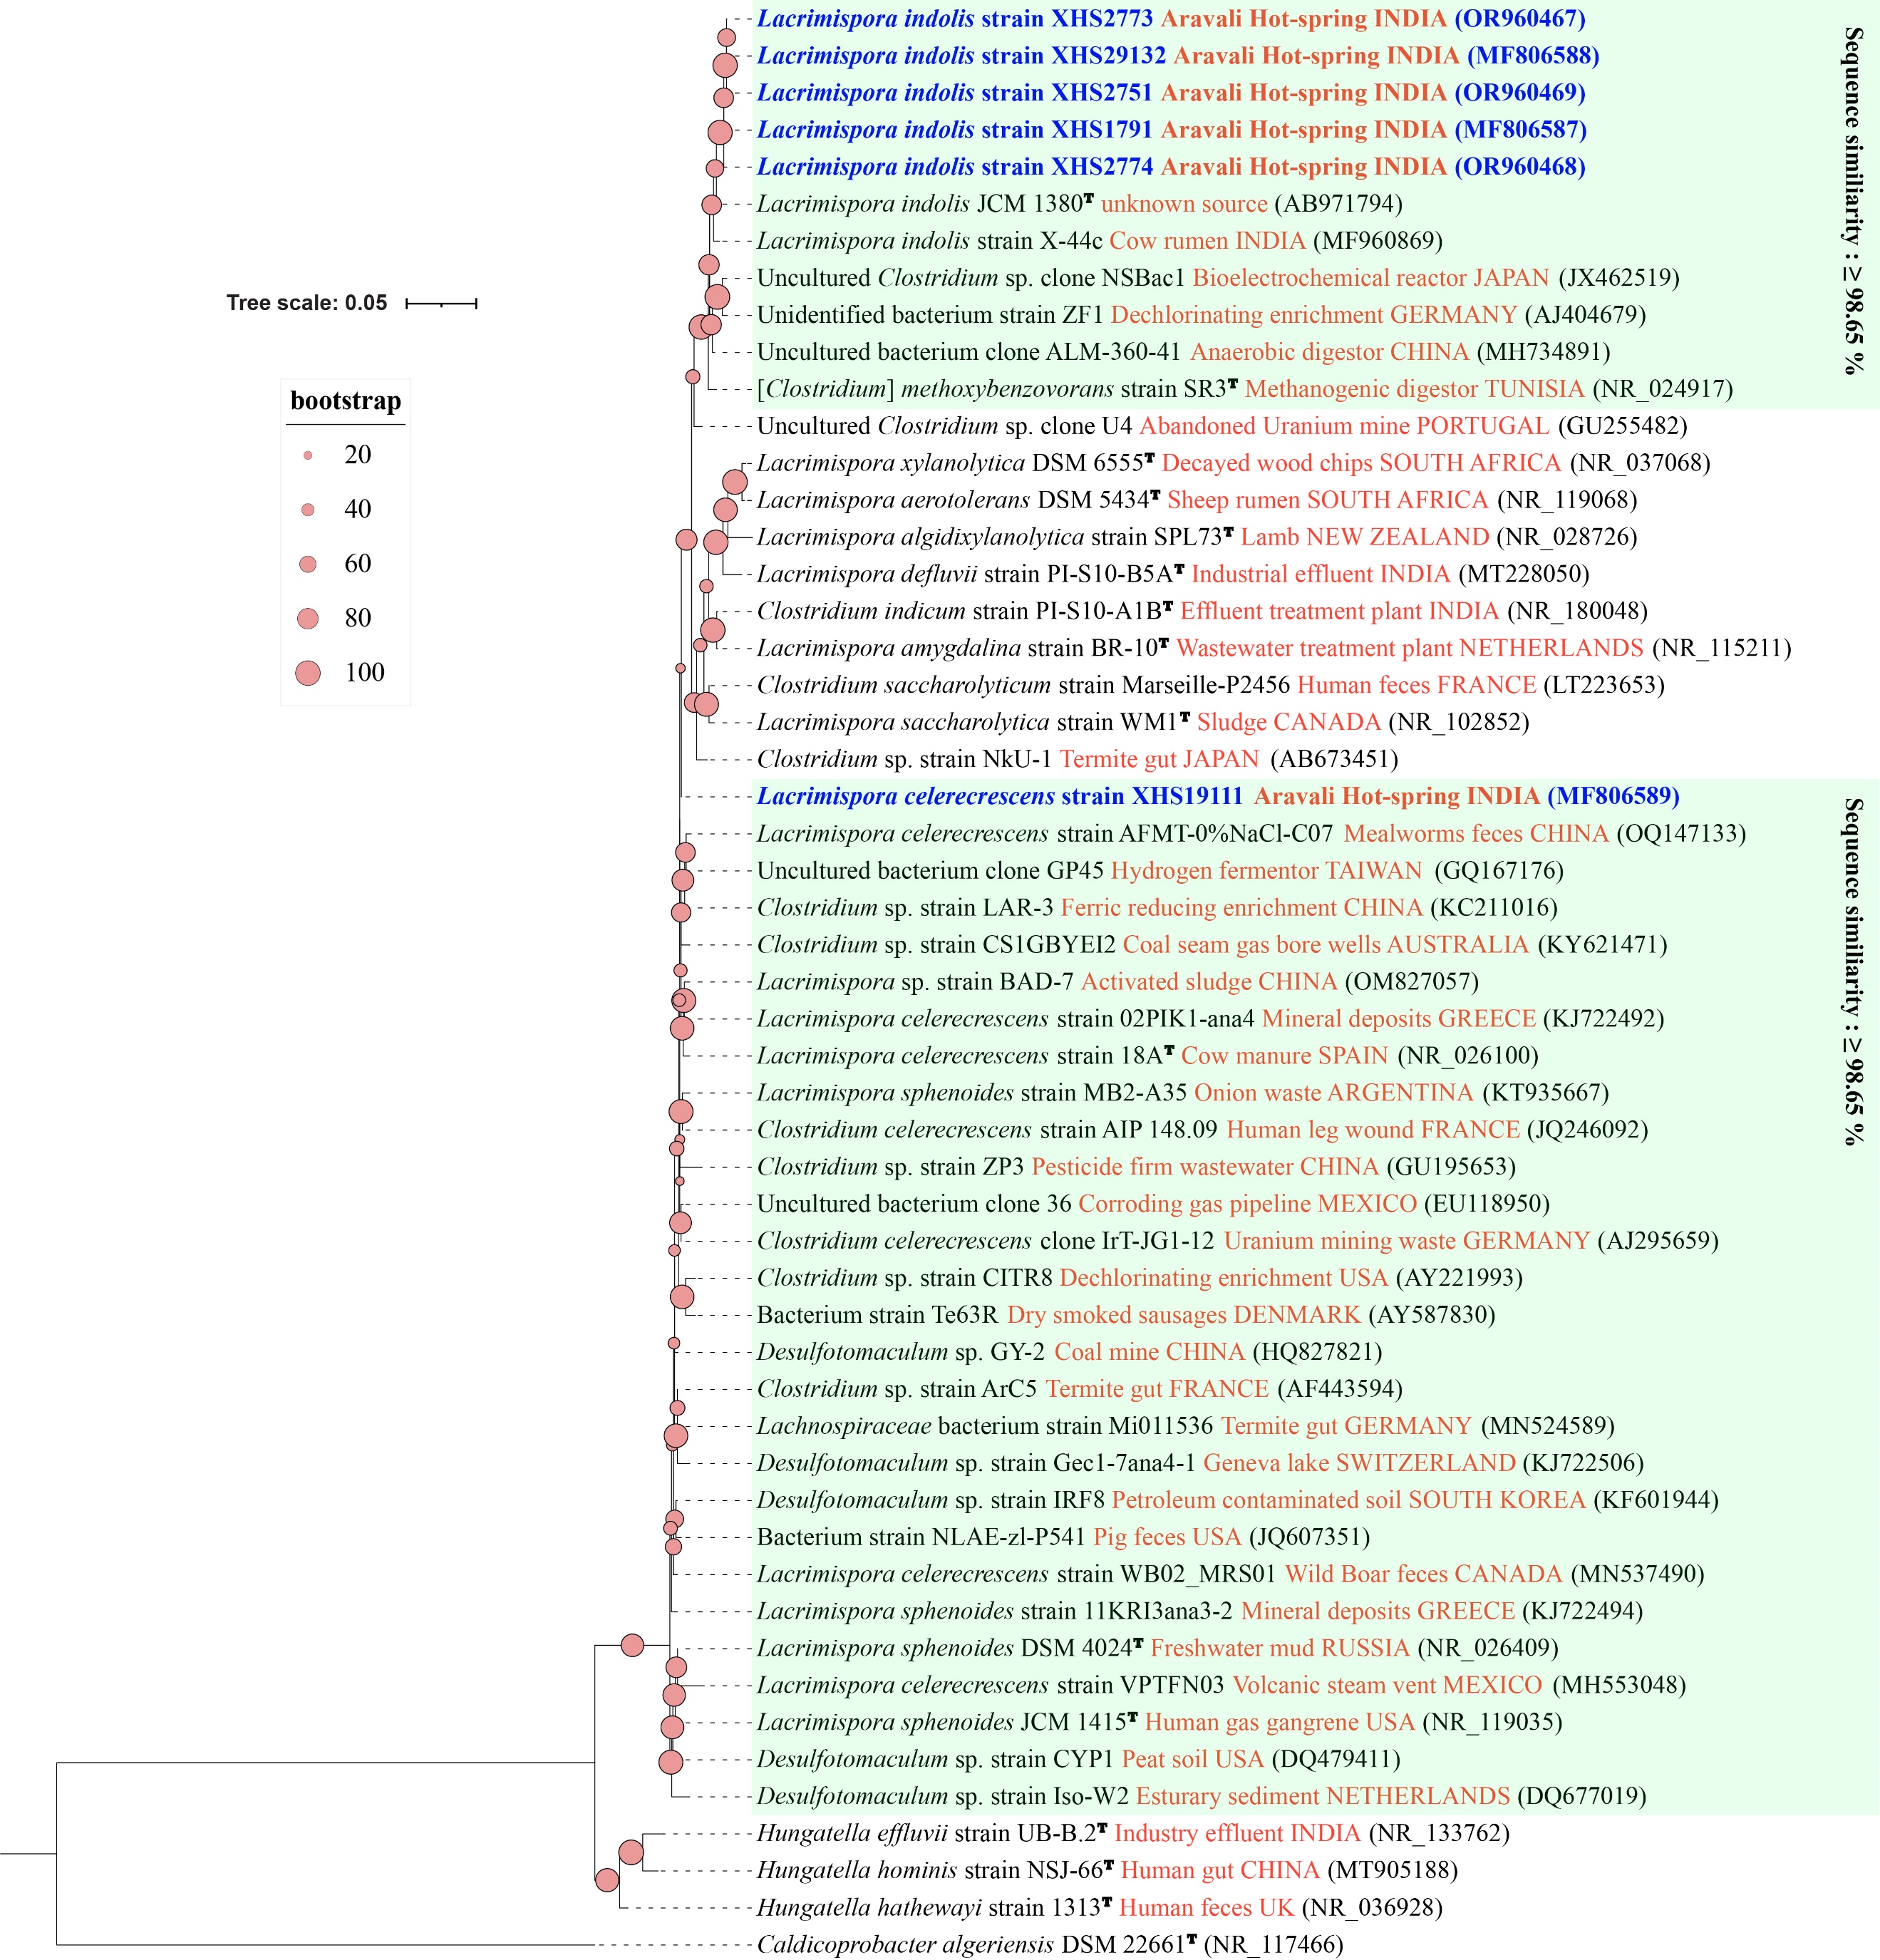


**Figure S9.** Phylogenetic tree based on 16S rRNA gene sequences showing the phylogenetic position of *Limnochordaceae* bacterium strain XUCP55106-1 (in blue) among the closest type strain and non-type strain sequences. Relatedness was inferred using the maximum-likelihood method in W-IQ-TREE and rooted with *Acetivibrio thermocellus* ATCC 27405T. The GenBank accession number of each strain is listed in parentheses. The habitat of the sequence is written in orange. The scale bar indicates 0.02 nucleotide substitutions per site.


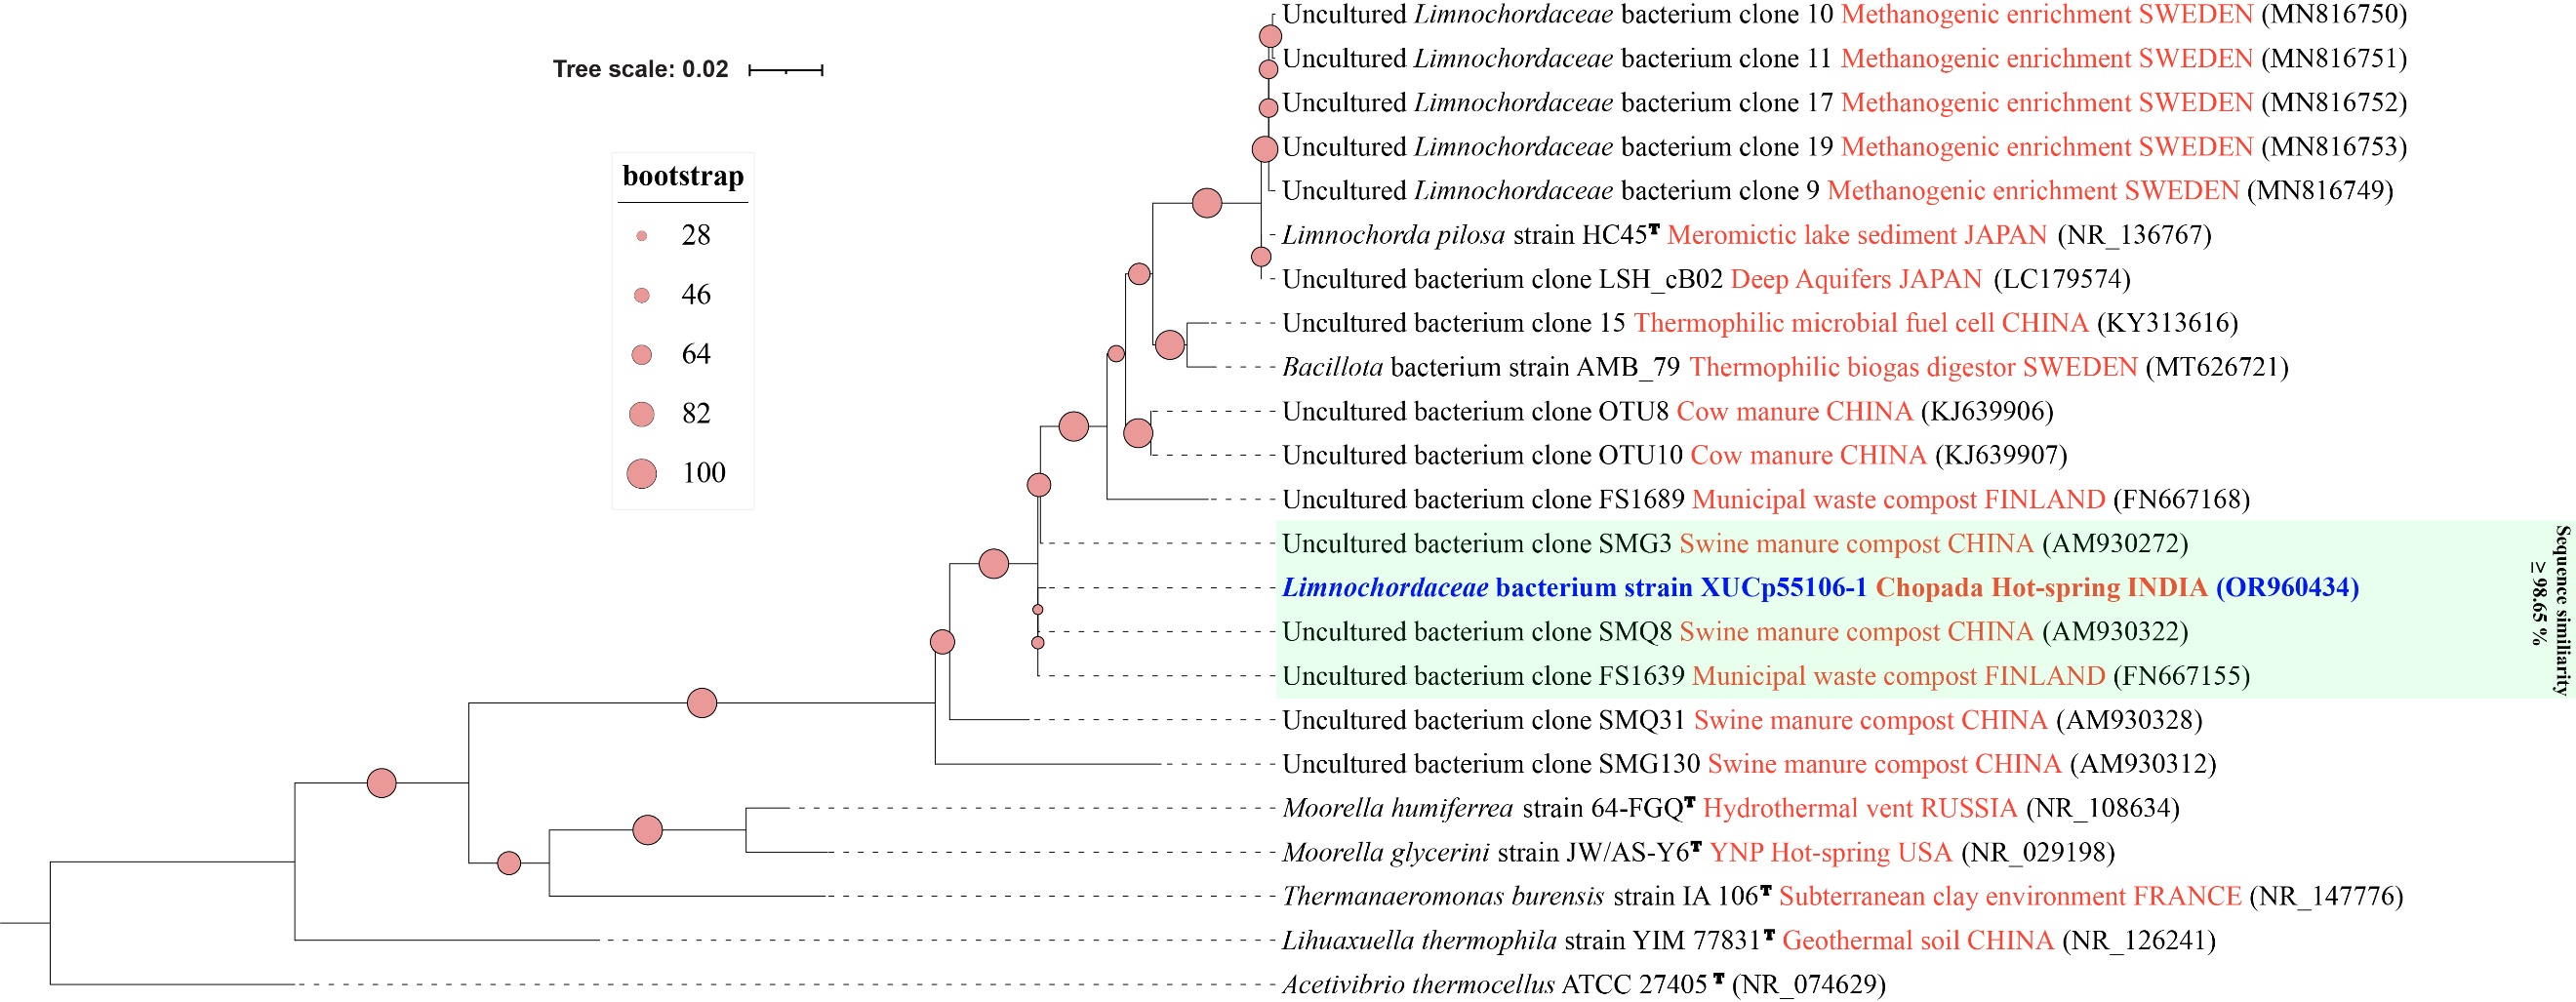


**Figure S10.** Phylogenetic tree based on 16S rRNA gene sequences showing the phylogenetic position of *Pseudoclostridium thermosuccinogenes* strains (in blue) among the closest type strain and non-type strain sequences. Relatedness was inferred using the maximum-likelihood method in W-IQ-TREE and rooted with *Sporohalobacter salinus* DSM 26781T. The GenBank accession number of each strain is listed in parentheses. The habitat of the sequence is written in orange. The scale bar indicates 0.1 nucleotide substitutions per site.


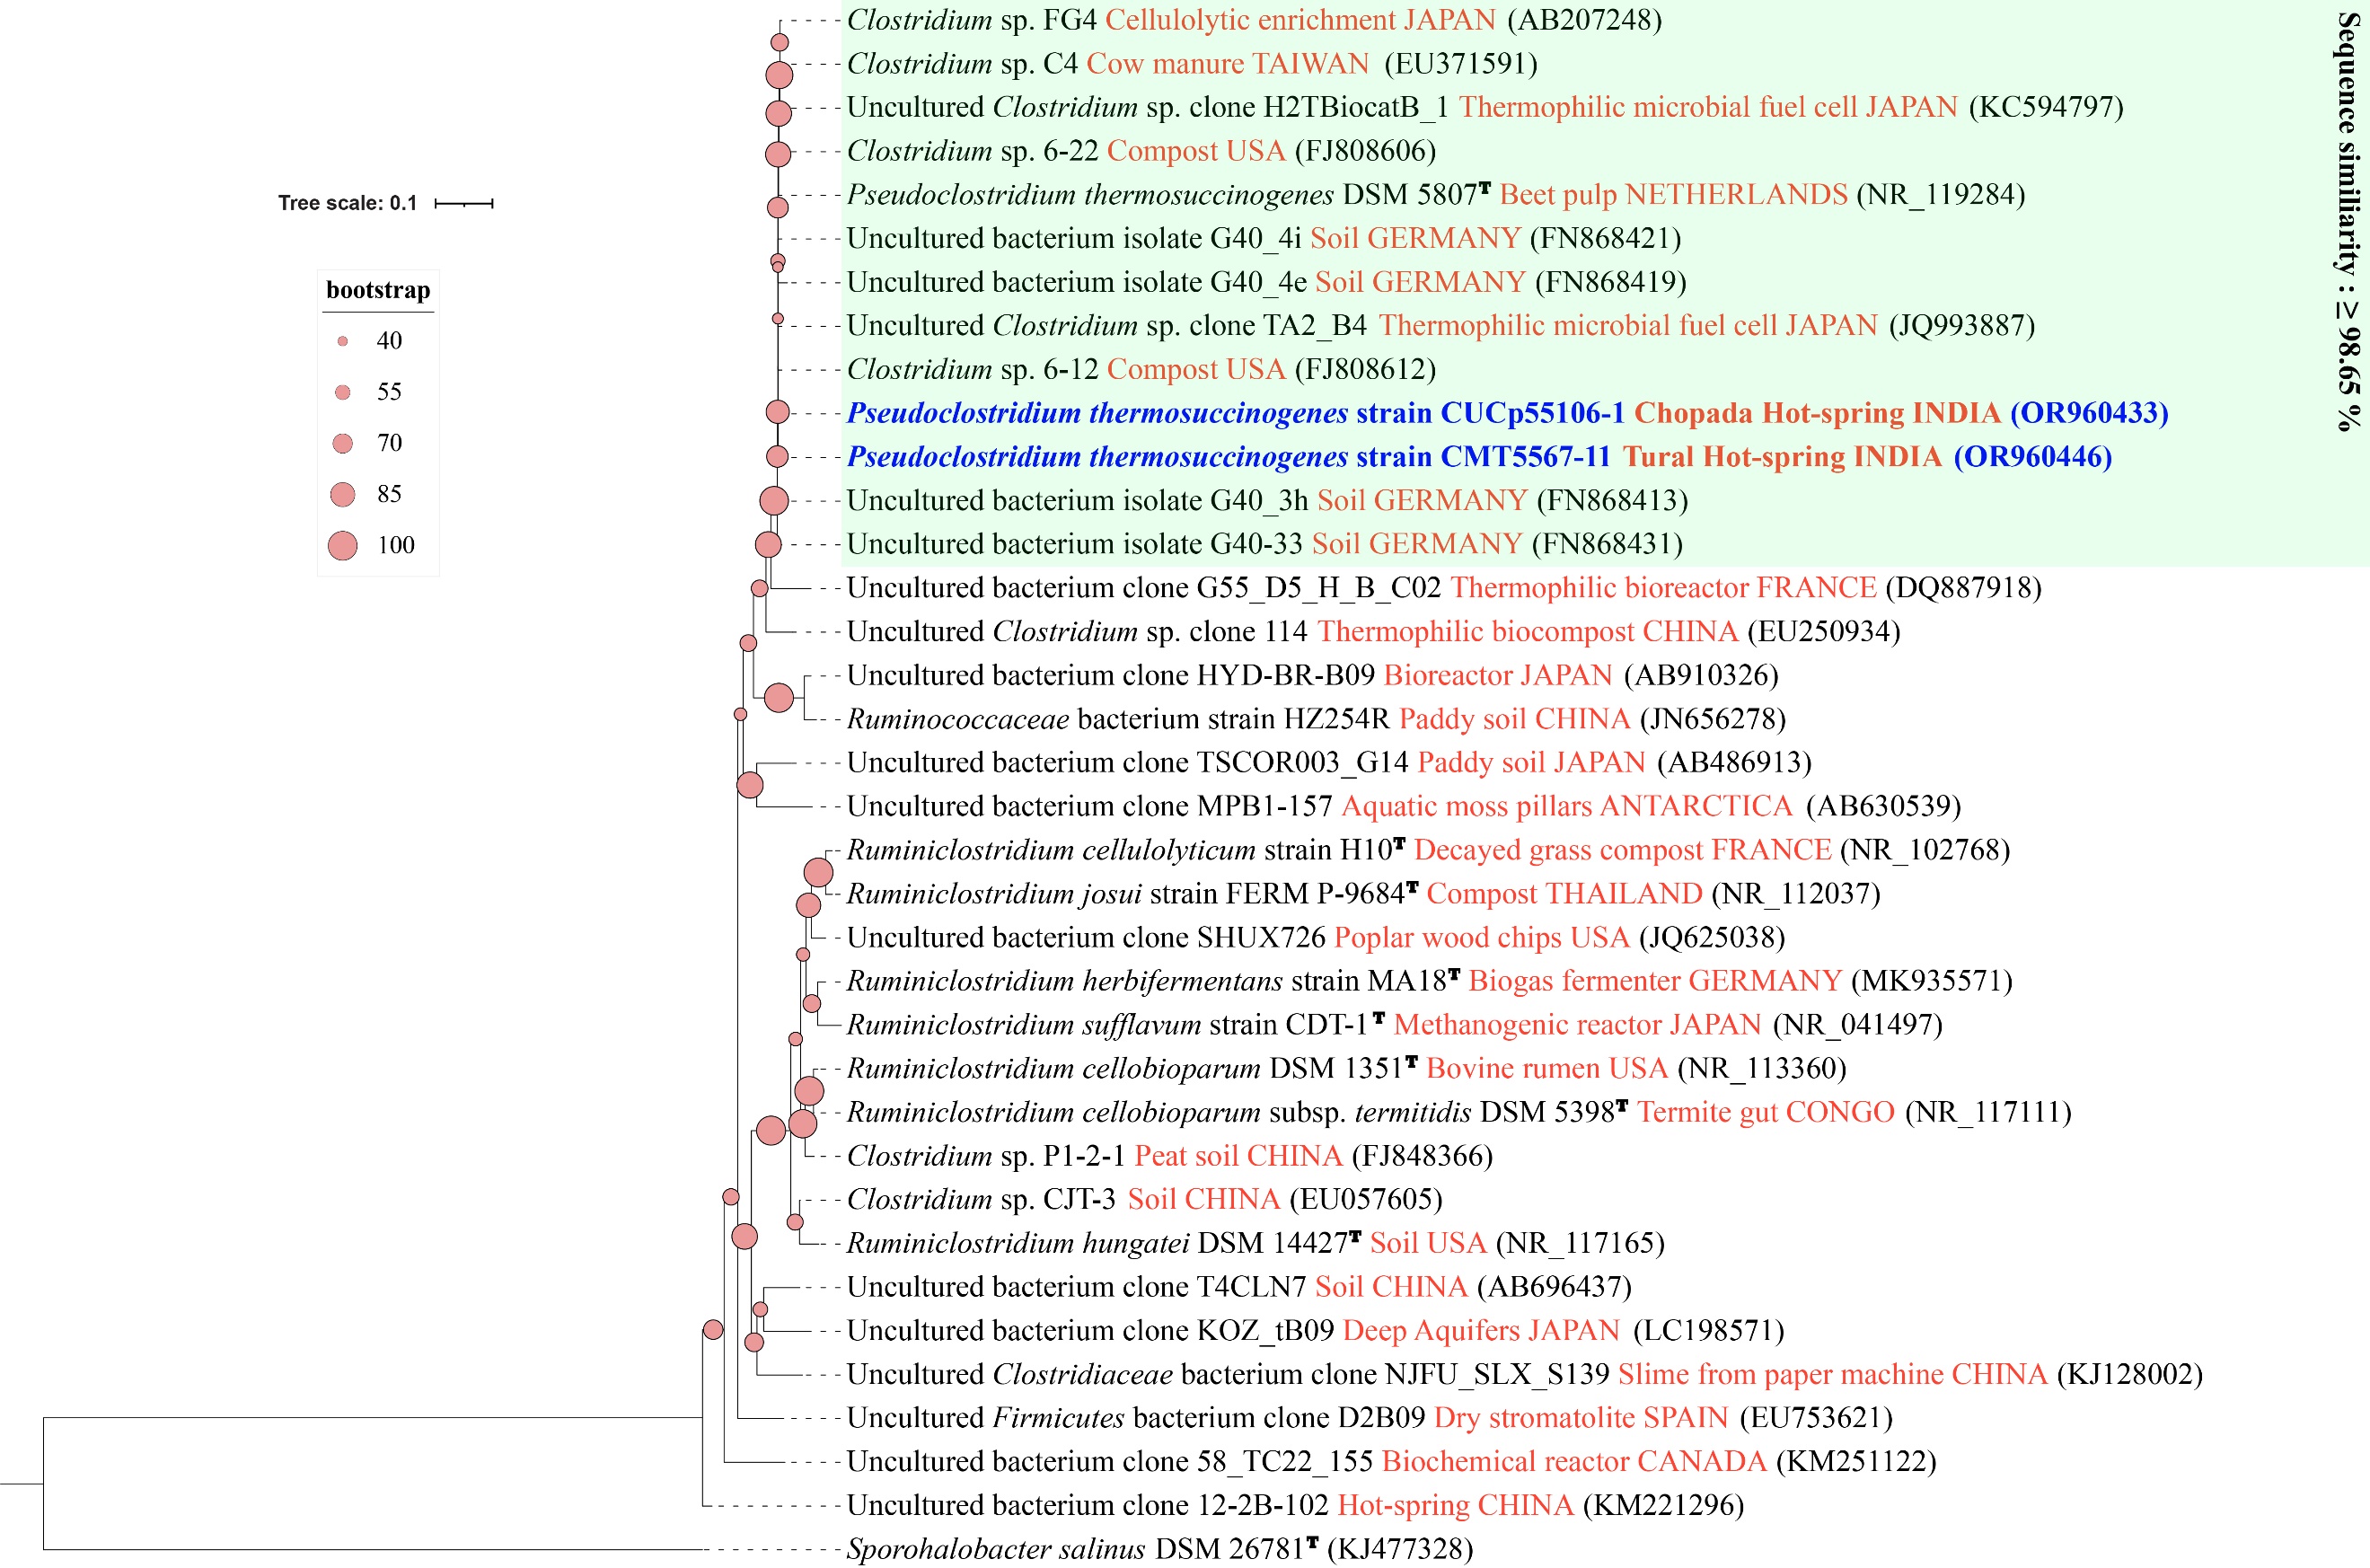


**Figure S11.** Phylogenetic tree based on 16S rRNA gene sequences showing the phylogenetic position of *Seramator thermalis* strain XHS2771 (in blue) among the closest type strain and non-type strain sequences. Relatedness was inferred using the maximum-likelihood method in W-IQ-TREE and rooted with *Prevotella herbatica* DSM 112534T. The GenBank accession number of each strain is listed in parentheses. The habitat of the sequence is written in orange. The scale bar indicates 0.02 nucleotide substitutions per site.


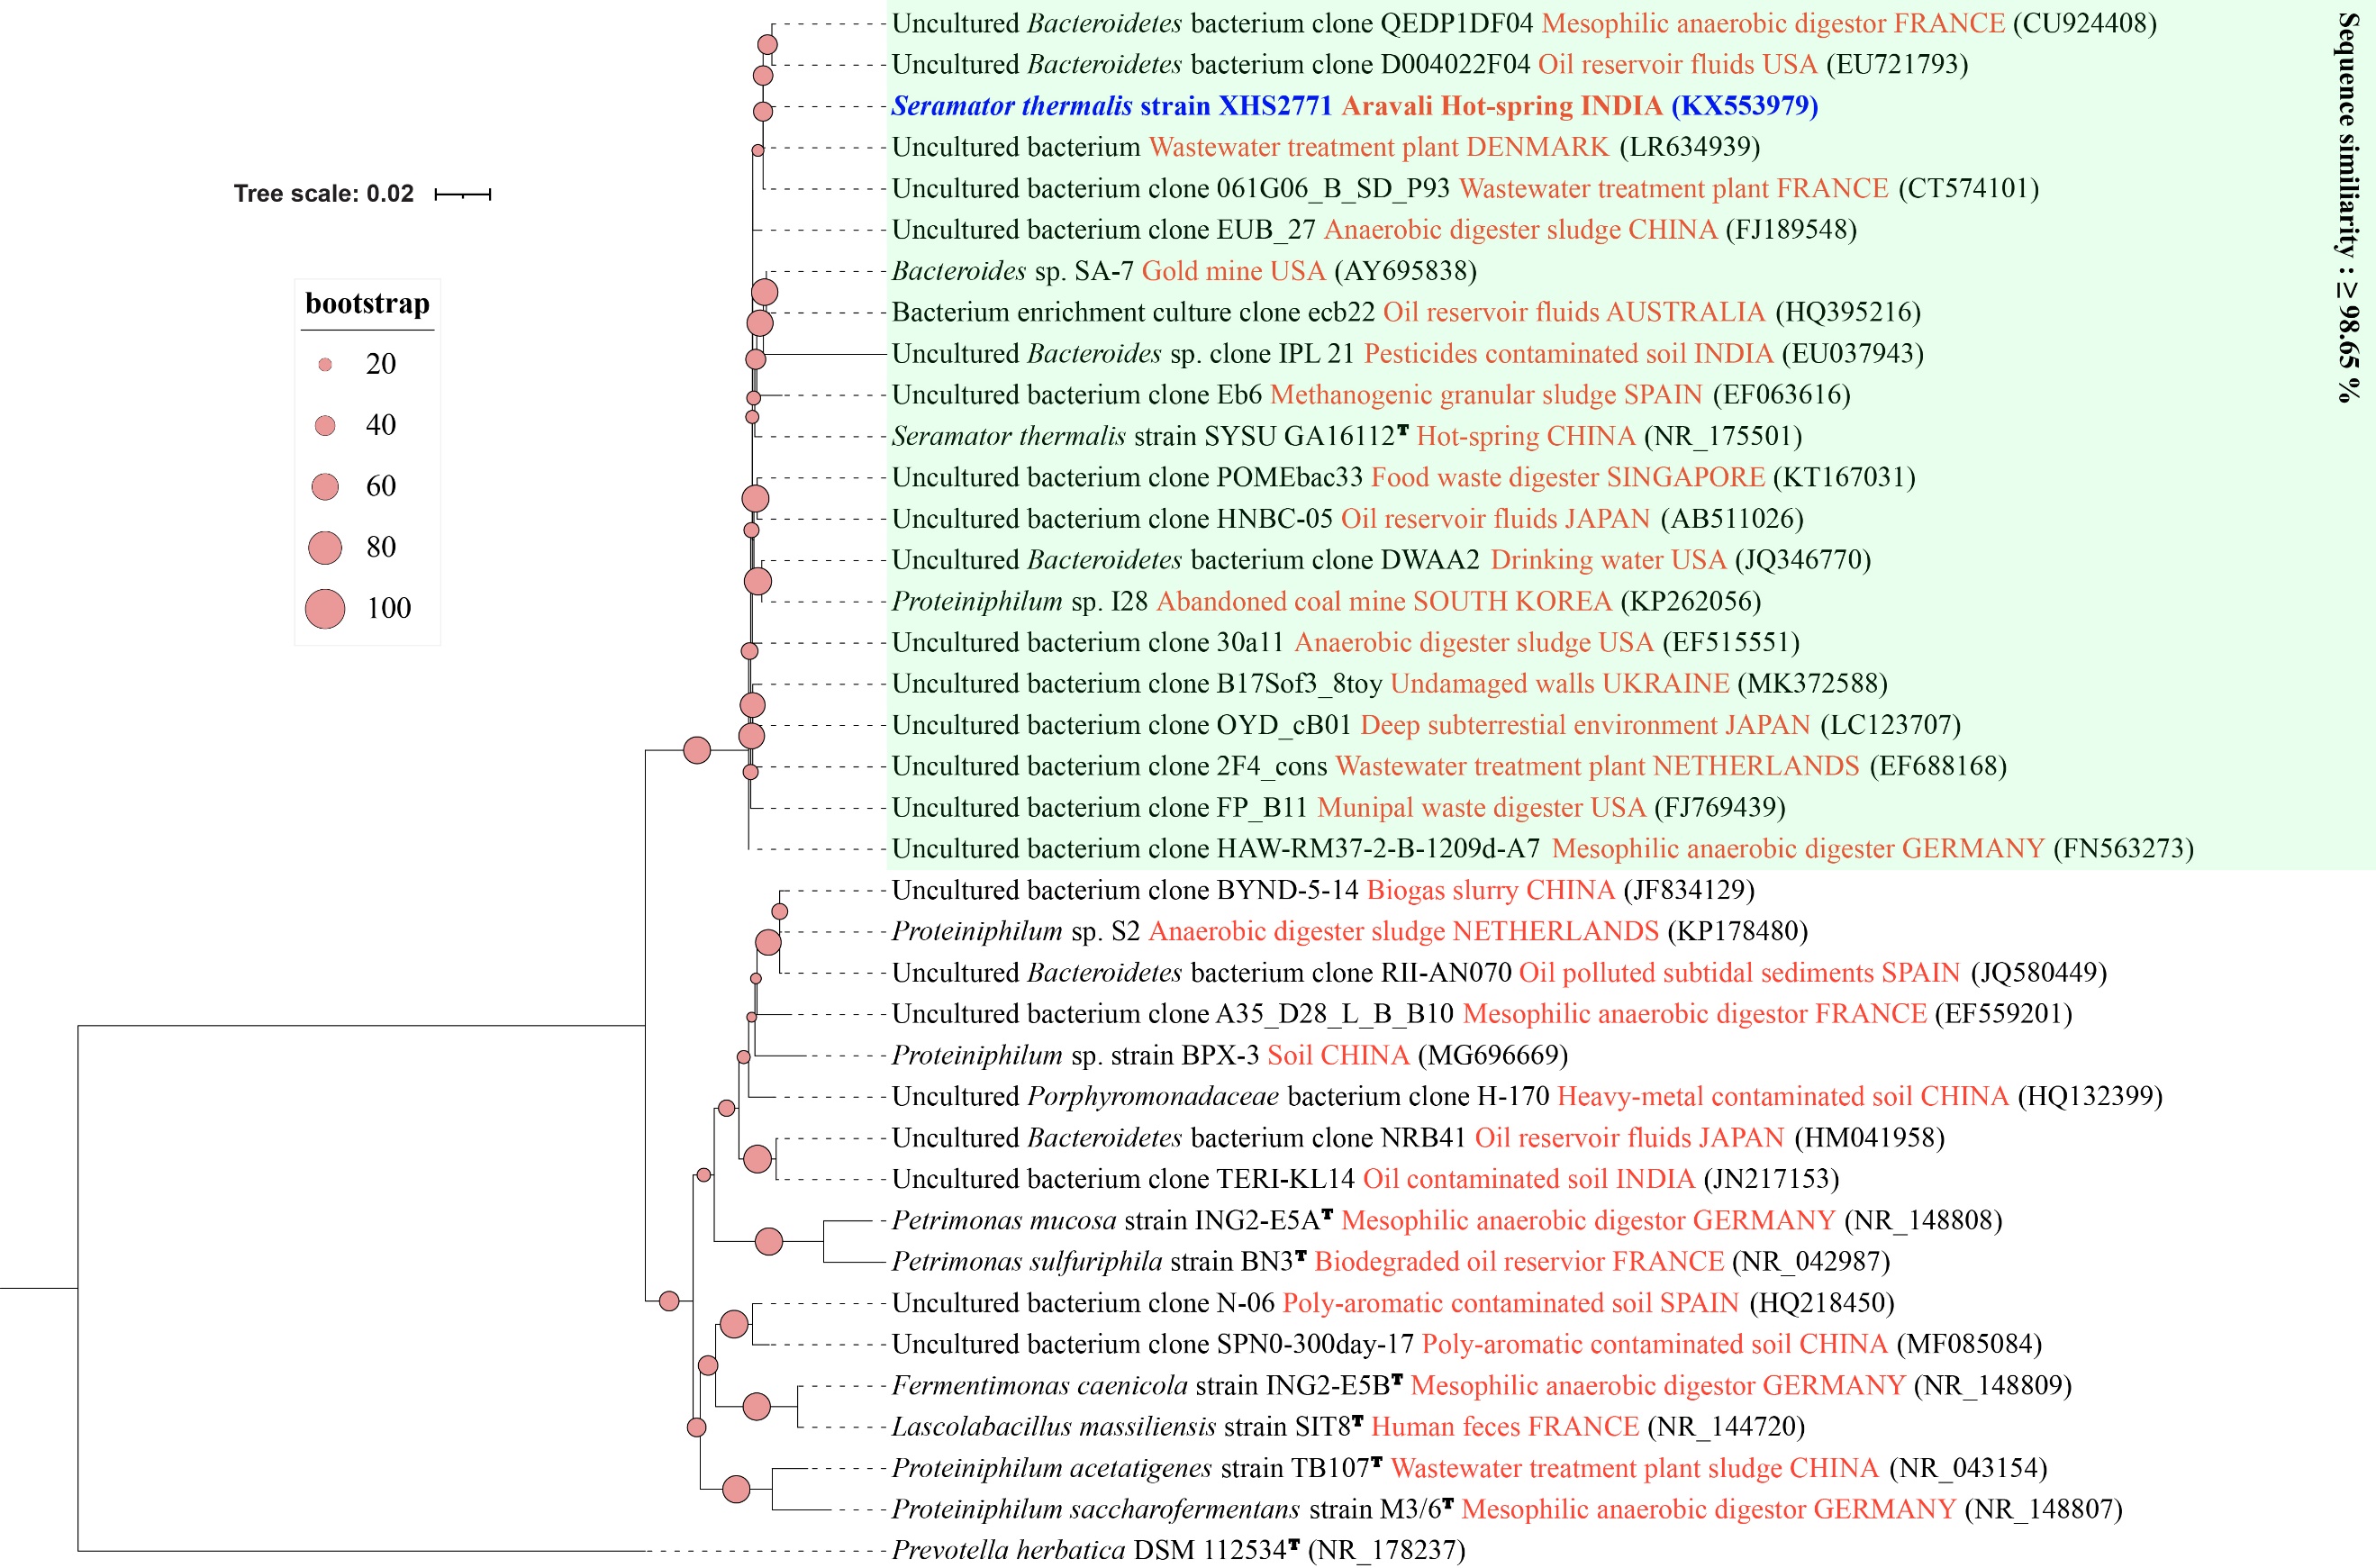


**Figure S12.** Phylogenetic tree based on 16S rRNA gene sequences showing the phylogenetic position of *Sporanaerobium hydrogeniformans* strain XHS1771T (in blue) among the closest type strain and non-type strain sequences. Relatedness was inferred using the maximum-likelihood method in W-IQ-TREE and rooted with *Thermoanaerobacter ethanolicus* ATCC 31550T. The GenBank accession number of each strain is listed in parentheses. The habitat of the sequence is written in orange. The scale bar indicates 0.1 nucleotide substitutions per site.


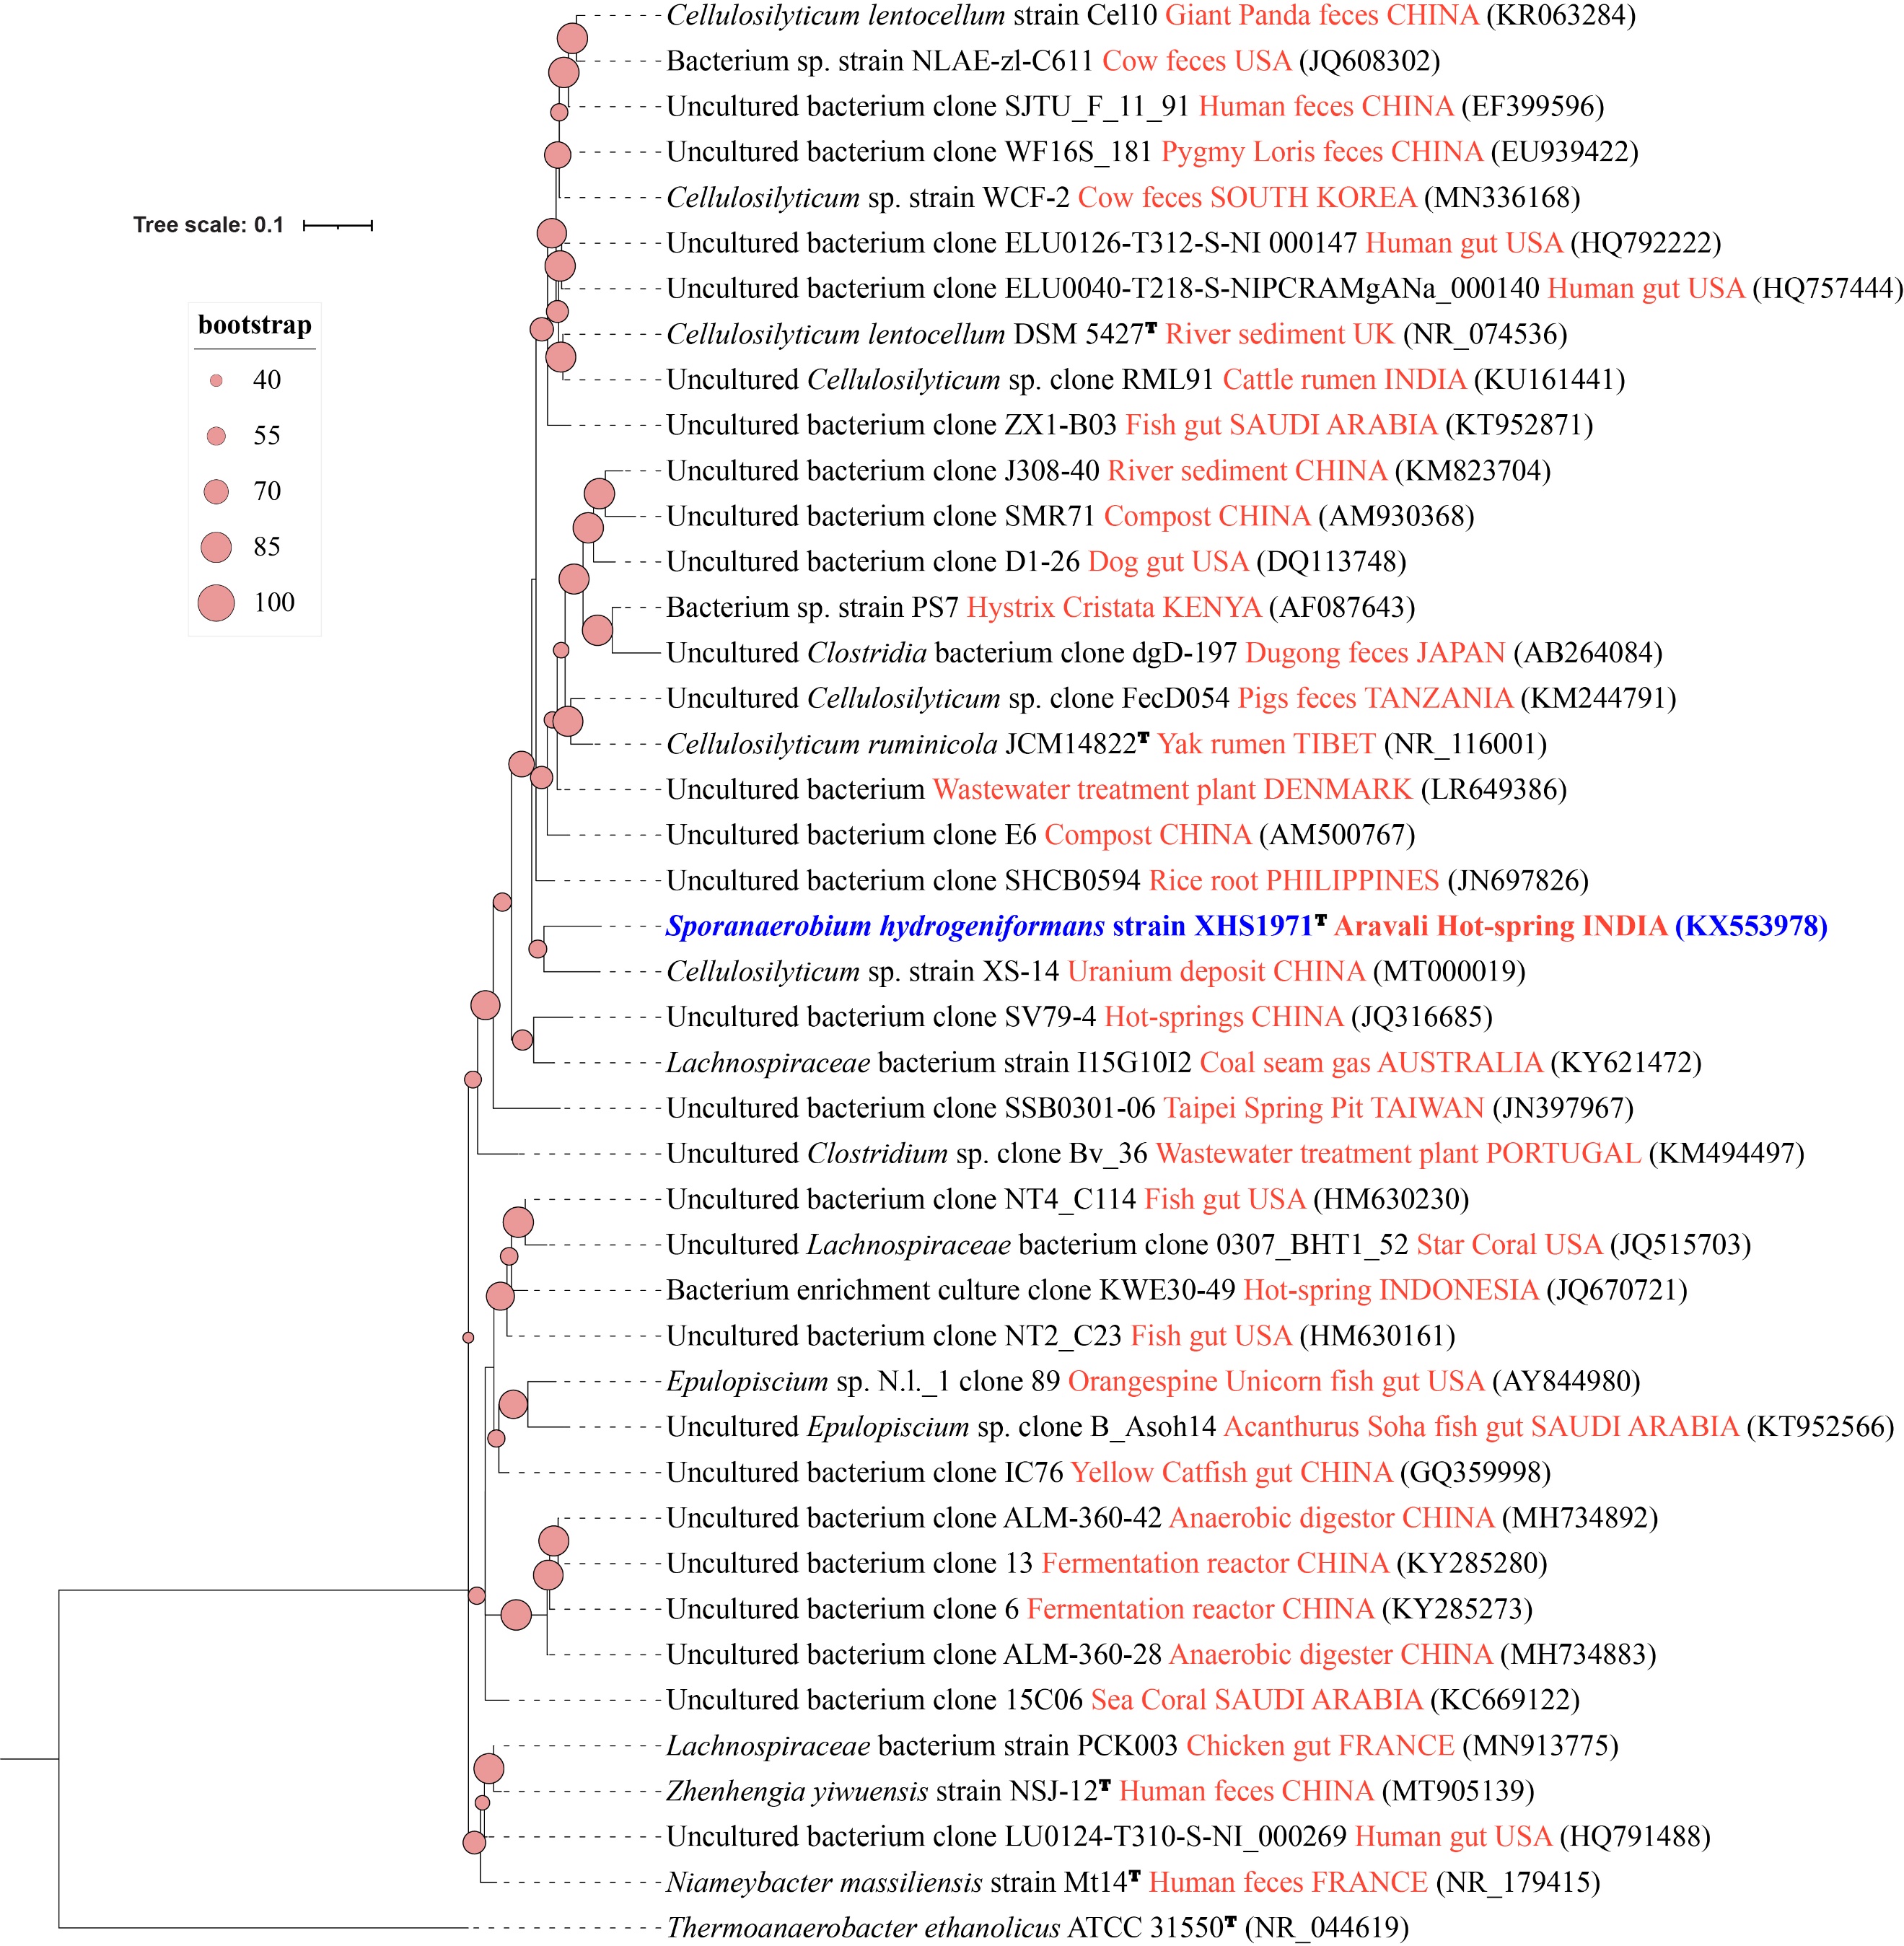


**Figure S13.** Phylogenetic tree based on 16S rRNA gene sequences showing the phylogenetic position of *Tepidimicrobium ferriphilum* strains (in blue) among the closest type strain and non-type strain sequences. Relatedness was inferred using the maximum-likelihood method in W-IQ-TREE and rooted with *Anaerosalibacter massiliensis* DSM 27308T. The GenBank accession number of each strain is listed in parentheses. The habitat of the sequence is written in orange. The scale bar indicates 0.02 nucleotide substitutions per site.


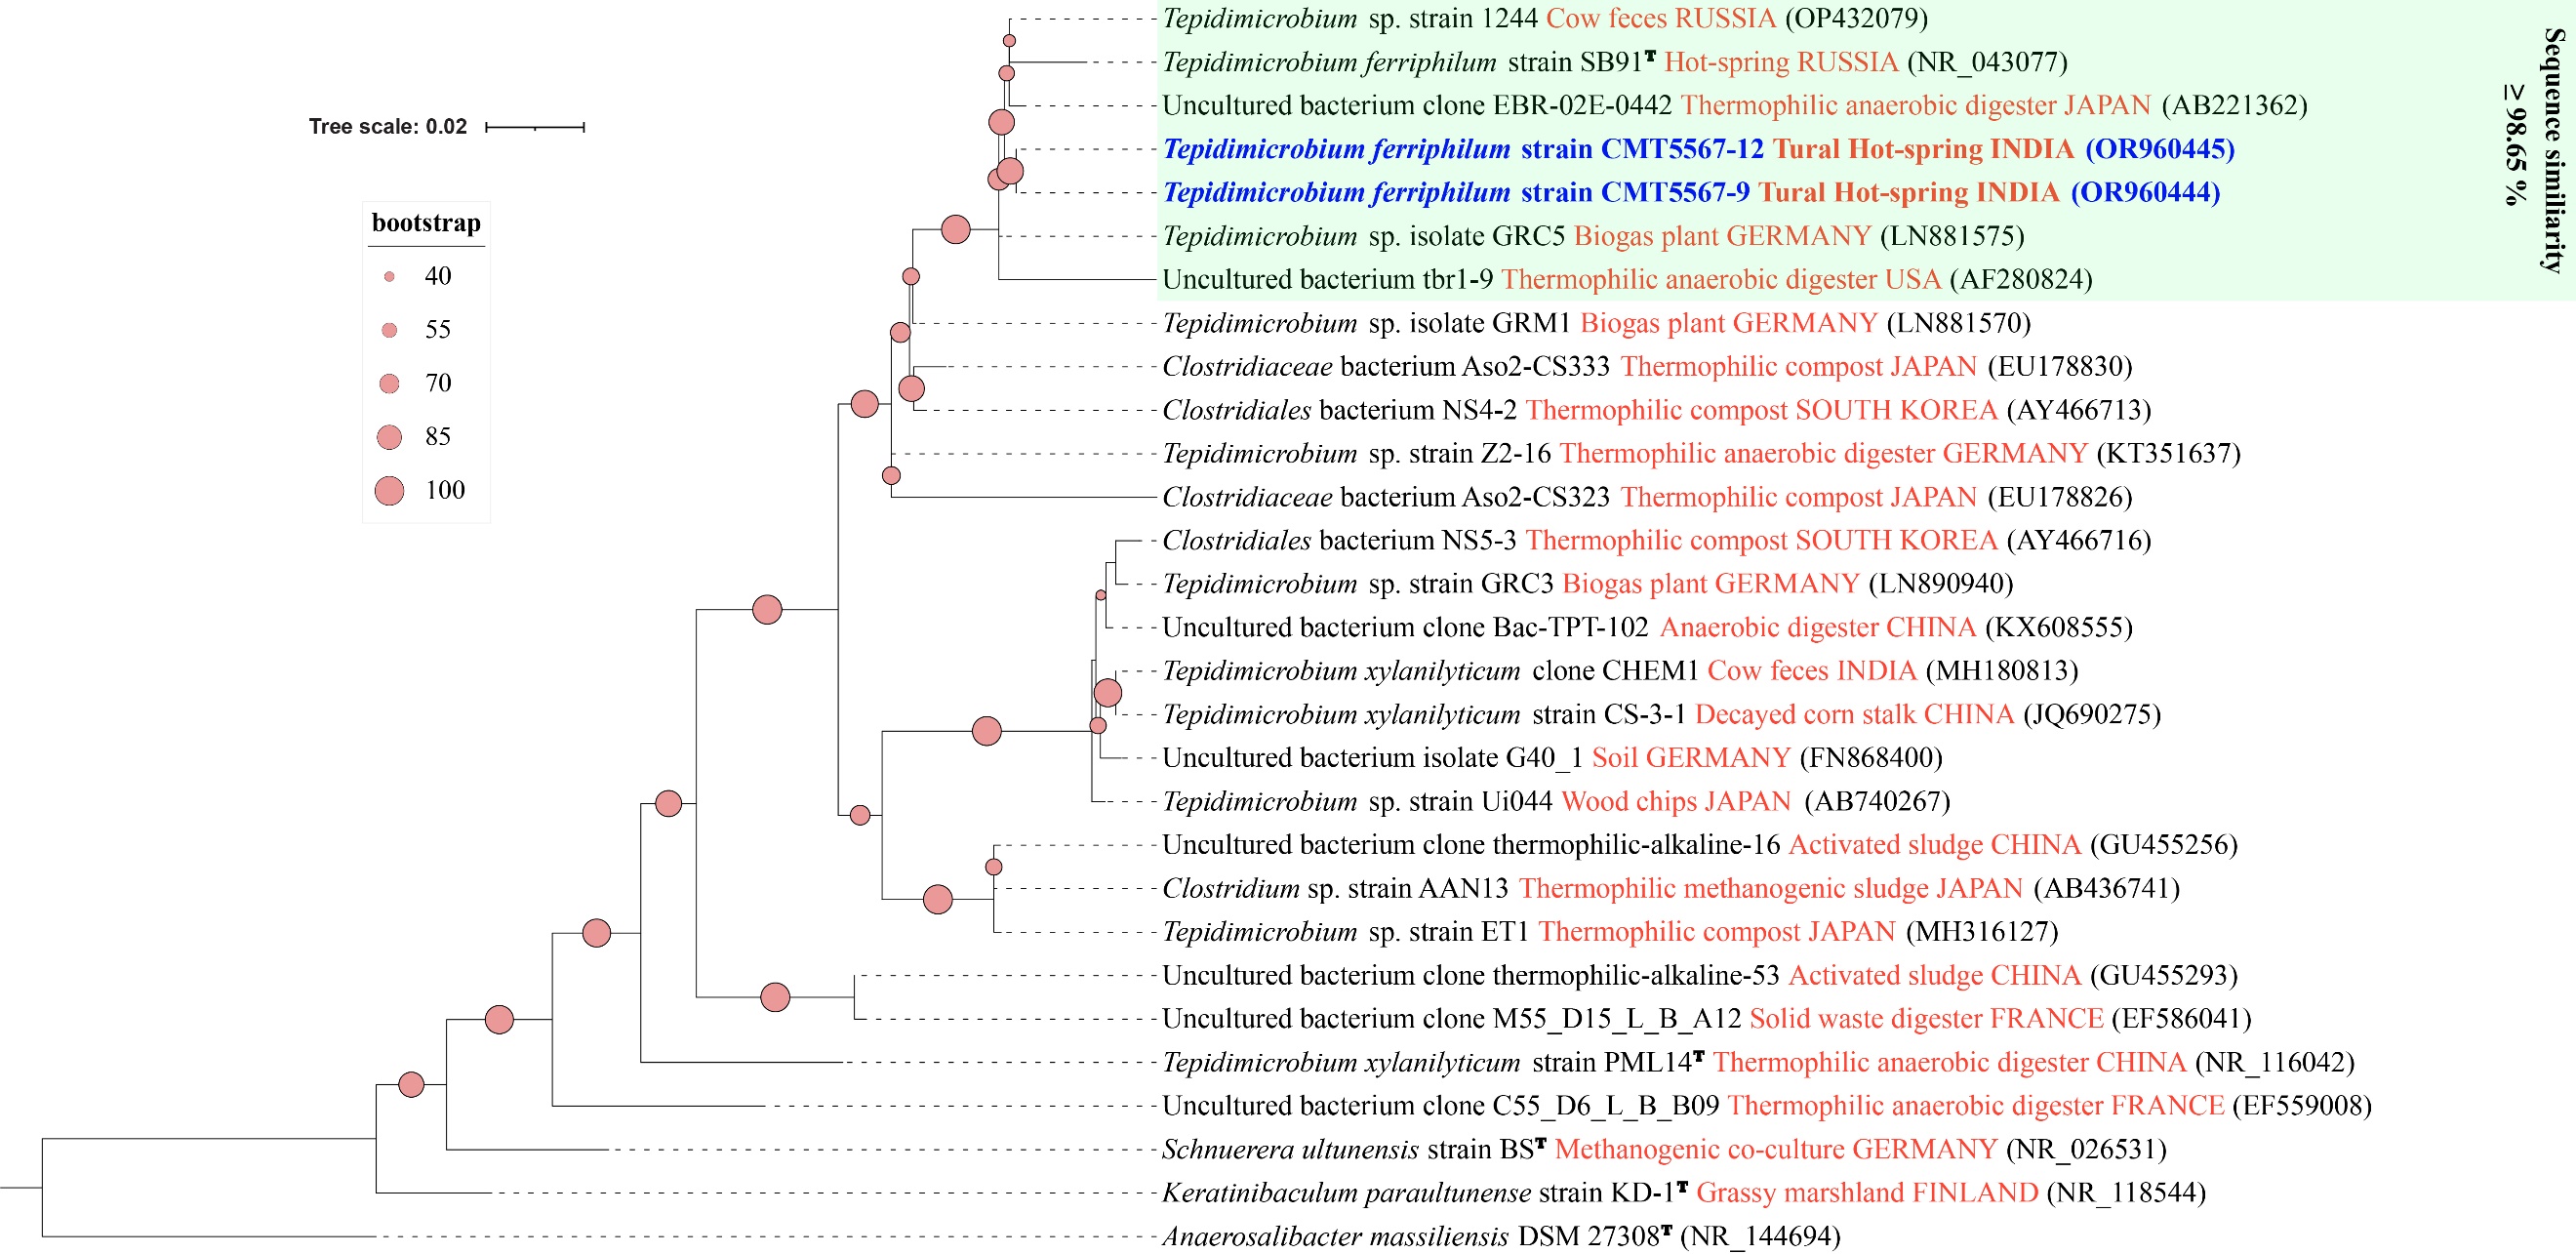


**Figure S14.** Phylogenetic tree based on 16S rRNA gene sequences showing the phylogenetic position of *Thermoanaerobacter wiegelii* strain XMU7067-6 (in blue) among the closest type strain and non-type strain sequences. Relatedness was inferred using the maximum-likelihood method in W-IQ-TREE and rooted with *Pelotomaculum propionicicum* DSM 15578T. The GenBank accession number of each strain is listed in parentheses. The habitat of the sequence is written in orange. The scale bar indicates 0.02 nucleotide substitutions per site.


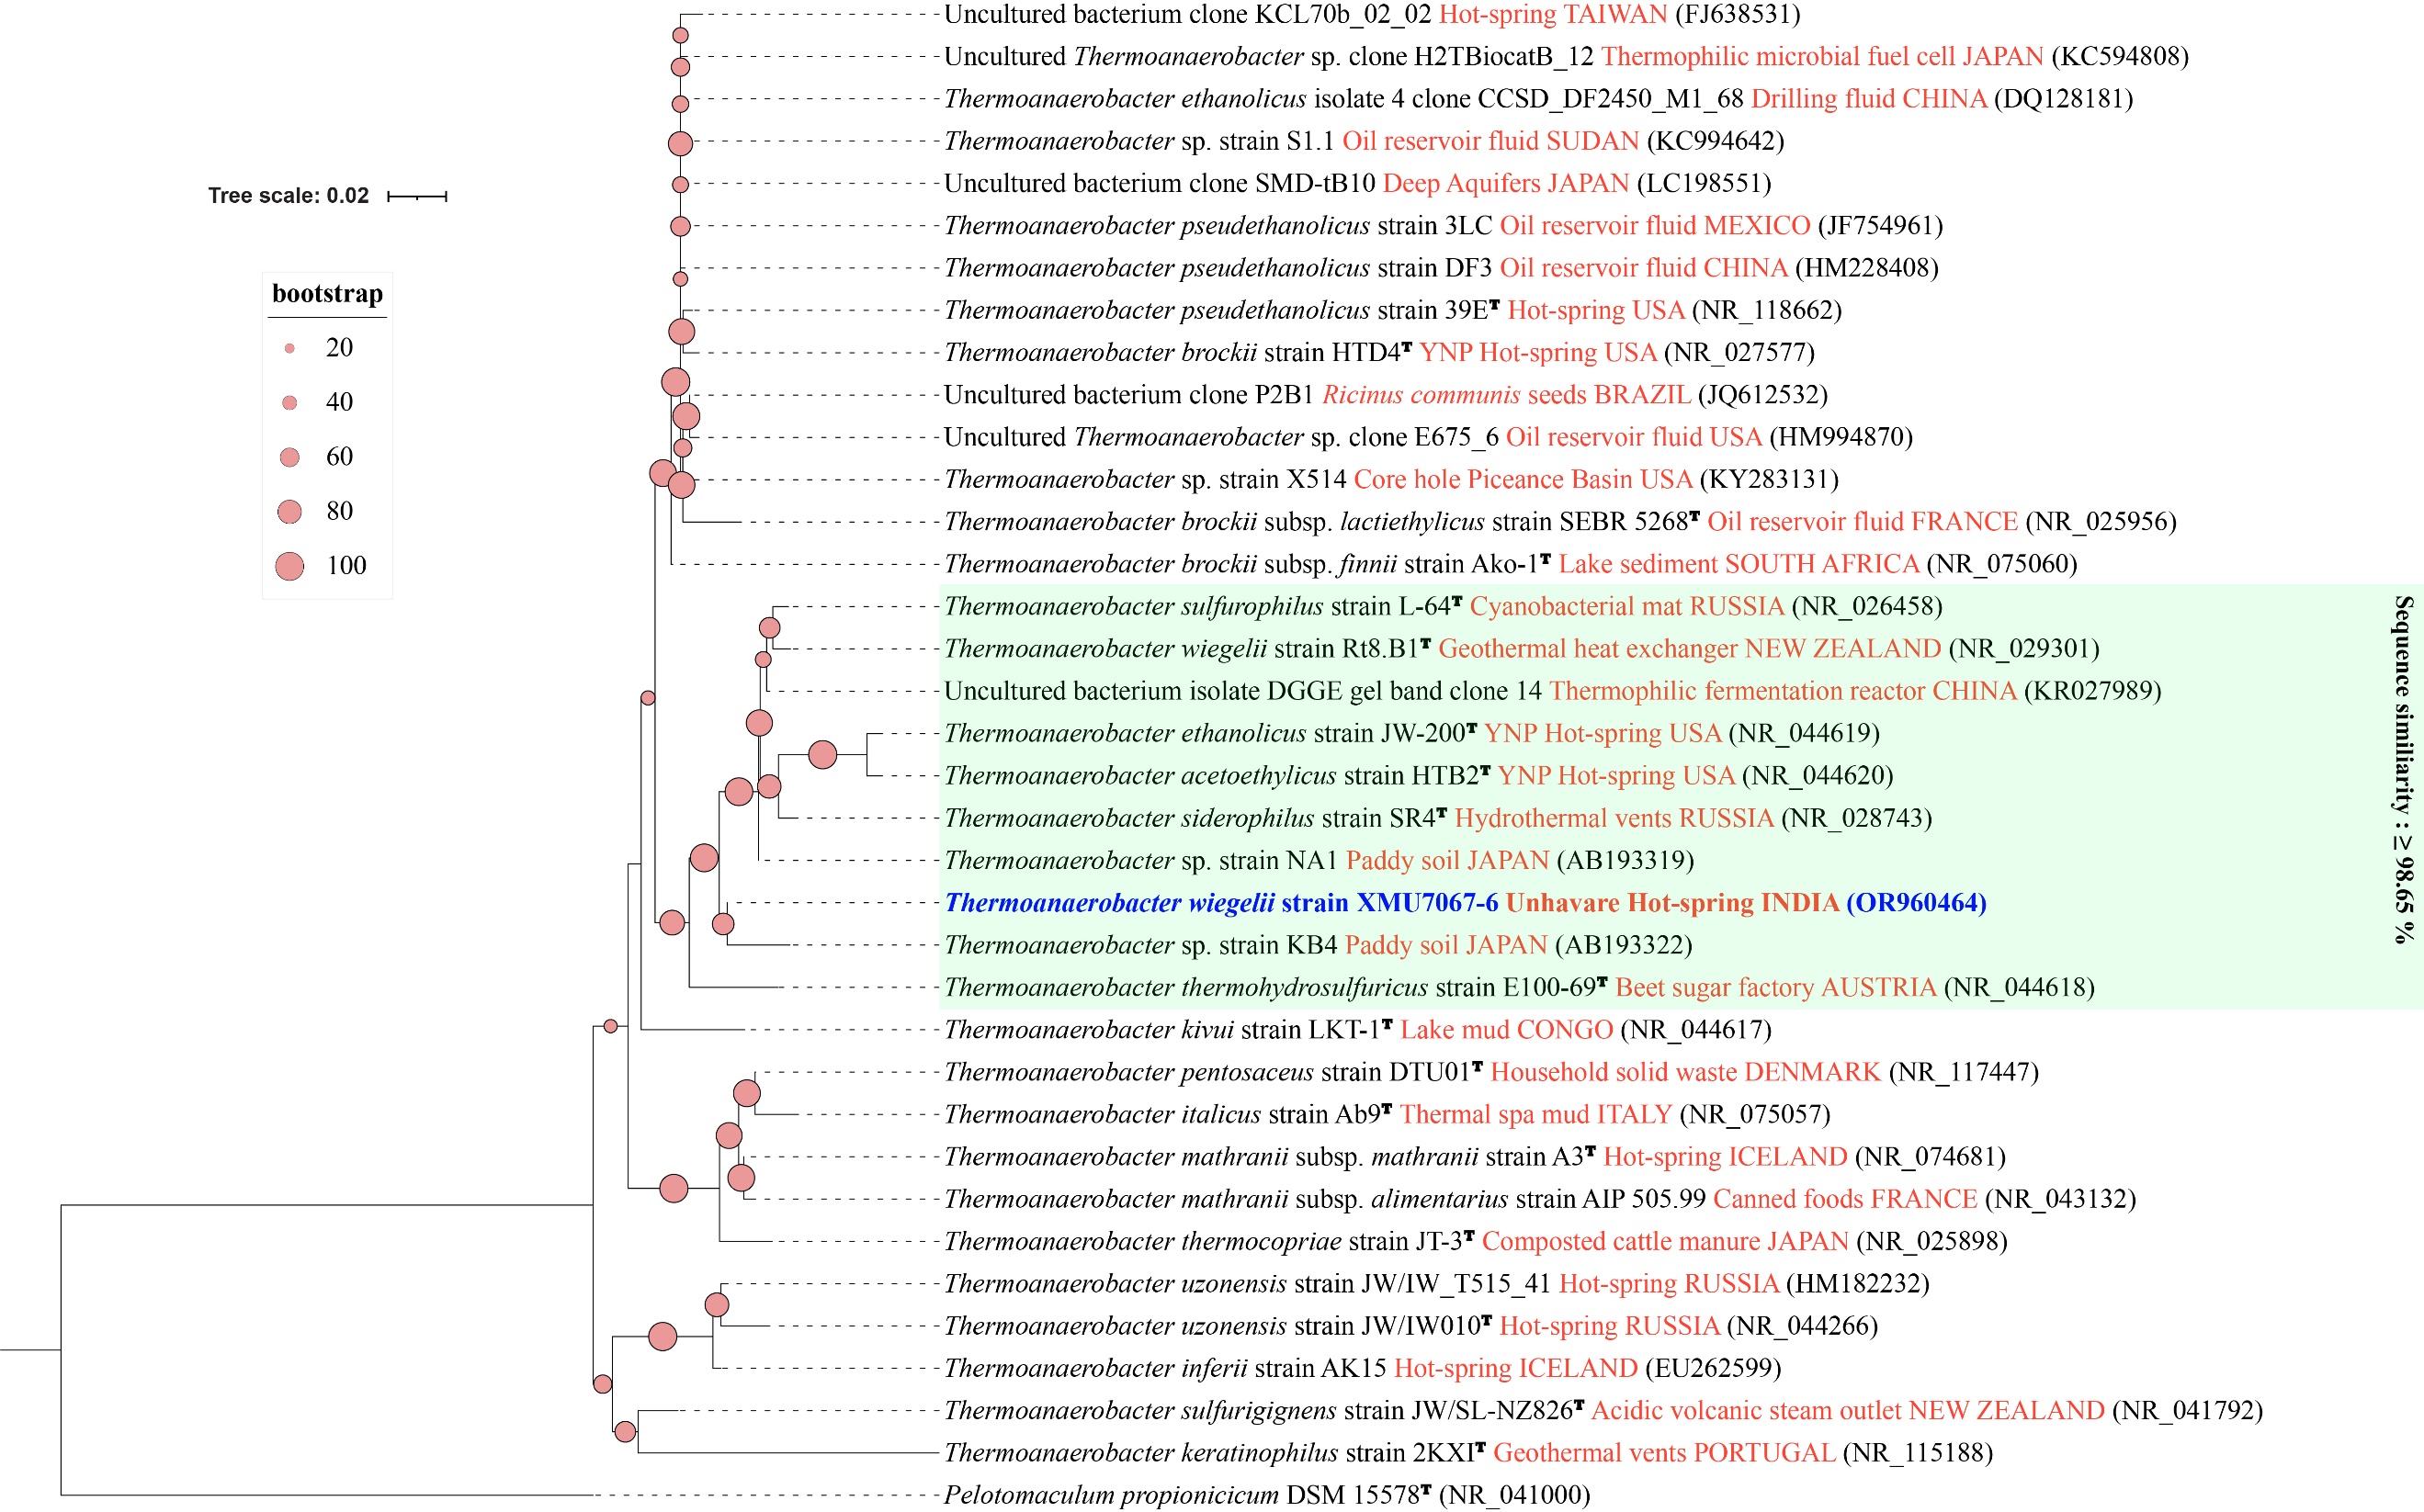


**Figure S15.** Phylogenetic tree based on 16S rRNA gene sequences showing the phylogenetic position of *Thermoanaerobacterium aotearoense*, *Thermoanaerobacterium butyriciformans*, and *Thermoanaerobacterium thermostercoris* strains (in blue) among the closest type strain and non-type strain sequences. Relatedness was inferred using the maximum-likelihood method in W-IQ-TREE and rooted with *Thermoanaerobacter brockii* DSM 1457T. The GenBank accession number of each strain is listed in parentheses. The habitat of the sequence is written in orange. The scale bar indicates 0.02 nucleotide substitutions per site.


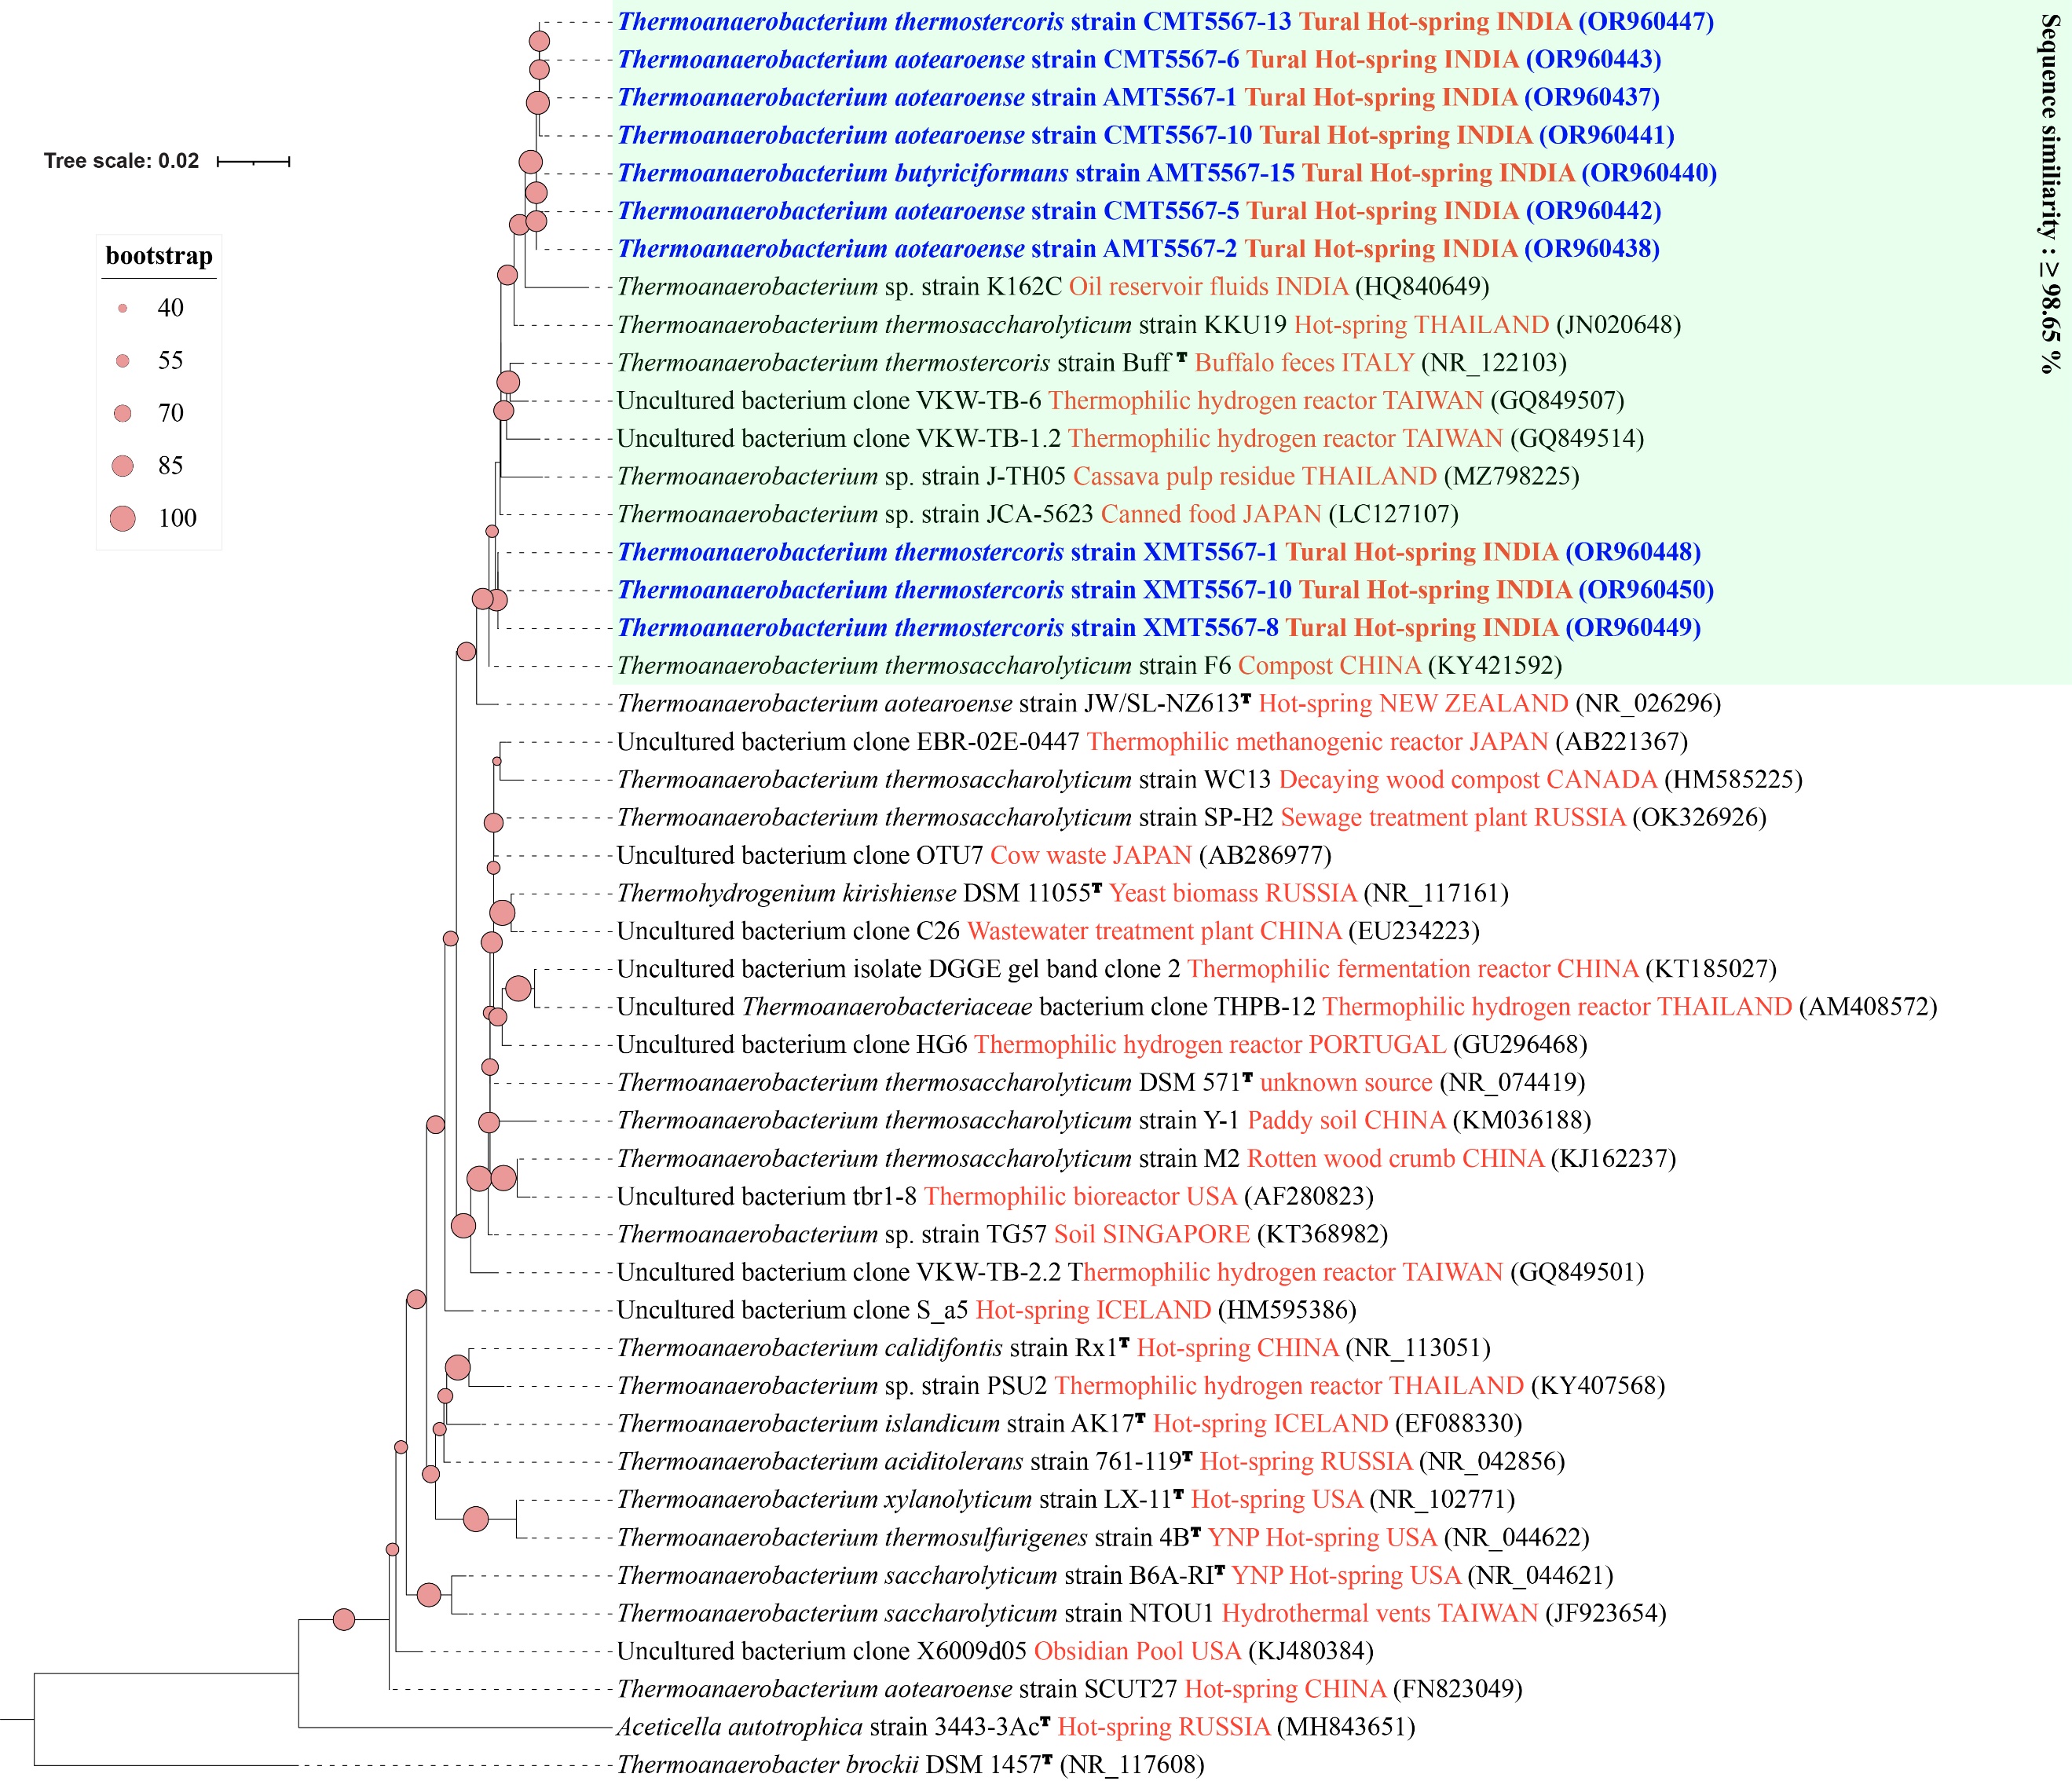

Supplement: Supplementary file 1 [file 1926d9b158c924670c57a602.docx]
